# Supplementary material for: Formic acid dehydrogenation catalysed by a novel amino-di(N-heterocyclic carbene) based Ru-CNC pincer complex
Source: Royal Society of Chemistry journal article supplement (doi:10.1039/d4cc05164e), 2025-01-01
Supplement: d4cc05164e1.pdf [file d4cc05164e1.pdf]

## *Supporting Information*

### **Formic acid dehydrogenation catalysed by a novel amino-di(*N*-heterocyclic carbene) based Ru-CNC pincer complex**

Patricia Aufricht, Valeria Nori, Brenda Rabell, Luca Piccirilli, Sakhitha Koranchalil, René W. Larsen, Mathias T. Nielsen\* and Martin Nielsen\*

Department for Chemistry, Technical University of Denmark (DTU), 2800 Kongens Lyngby, Denmark

#### **General Information**

All syntheses, unless otherwise stated, were performed in air. Handling of air-sensitive reagents was conducted under inert gas conditions using standard Schlenk or glovebox techniques. Ligand precursors were commercially achieved and used without further purification. Solvents were deoxygenated by argon bubbling and dried from water impurities by the use of an Inert Puresolv solvent purification system. Ionic liquids were commercially acquired and used without further purification.  $\text{RuCl}_2(\text{PPh}_3)_2(\text{dmf})$  was synthesised according to literature procedure.<sup>1</sup>

#### **Instrumentation**

##### **Nuclear Magnetic Resonance spectroscopy (NMR)**

NMR spectra were obtained using a Bruker Ascend 400, or 800 MHz spectrometer equipped with BBFO and TCI CryoProbe probes. Chemical shifts are expressed in ppm relative to tetramethylsilane (TMS) for  $^1\text{H}$  and  $^{13}\text{C}$  spectra using residual solvent signal peaks or TMS as internal reference. For  $^{31}\text{P}$  spectra, values are expressed in ppm relative to  $\text{H}_3\text{PO}_4$ . Residual solvent chemical shifts are explained according to literature.<sup>2</sup> Coupling constants, if available, are given in Hz as absolute values. Multiplicities are given as singlets (s), doublets (d), triplets (t), heptets (hept), doublets of a doublet of a doublet (ddd) and multiplets (m). Literature-known compounds were analysed only using  $^1\text{H}$ -NMR spectroscopy to confirm purity. NMR spectra were analysed using MestReNova software.

##### **Single-Crystal X-ray diffraction (SC-XRD)**

All crystals were submerged in polybutene oil (Sigma, > 90%) as protection against oxidation and hydrolysis by air. Suitable crystals were identified using light microscopy and harvested

with a MiTeGen cryo loop. They were mounted on a 5-axis goniometer attached to a Rigaku SuperNova dual source CCD-diffractometer. The measurements were conducted at 120 K using either Mo K $\alpha$  or Cu K $\alpha$  radiation. Structures were solved using Olex2<sup>3</sup> equipped with SHELXT<sup>4</sup> software using intrinsic phasing and refined to completion using SHELXL employing least square minimizations against F<sup>2</sup>. Thermal ellipsoids are printed at 50% probability. All depictions follow the following colour code: hydrogen white, carbon grey, oxygen red, nitrogen blue, chlorine dark green, ruthenium dark blue.

### **Infrared Spectroscopy (ATR-IR)**

Solid-state attenuated total reflectance Fourier transform infrared (ATR-FTIR) spectroscopy was performed employing a VERTEX 80 vacuum Fourier transform spectrometer from Bruker Optics GmbH equipped with a Germanium-coated KBr beam splitter, a LN<sub>2</sub>-cooled HgCdTe detector and global radiation source. The solid samples were brought in contact with a Germanium ATR crystal of a single-reflection ATR accessory from PIKE Technologies, Inc., which in contrast to a conventional diamond ATR crystal is highly transparent in the important spectral region of the Ru-H stretching fundamental transitions around 2000 cm<sup>-1</sup>. Blocks of 300 co-added scans with a spectral resolution of 2 cm<sup>-1</sup> were collected both with the sample and of the cleaned ATR crystal before and after sample measurements. Minor traces of residual water vapor absorption were subtracted and gentle corrections for baseline drifts were introduced before the final application of extended ATR corrections compensating for the wavelength-dependent penetration depth of the infrared probe beam into the sample.

### **High-Resolution Mass Spectrometry (HR-MS)**

HR-MS measurements were taken on a Thermo Fisher Orbitrap Exploris 120, mounted with a H-ESI source. All spectra were recorded at 30k FWHM resolution. For analysis of the FADH reactions mixtures: an aliquot was collected (at the first 45 minutes and after 2 cycles and 3 hours, respectively) and dissolved in MeOH/MiliQ water (50:50 v/v) under a N<sub>2</sub> atmosphere, passed through a syringe filter and injected into the HR-MS spectrometer.

### **Gas chromatography (GC)**

GC-TCD measurements were taken on an Agilent Technologies 6890M Network GC system.

## Experimental

### Synthesis of [<sup>i</sup>PrCNC][Cl]<sub>2</sub>

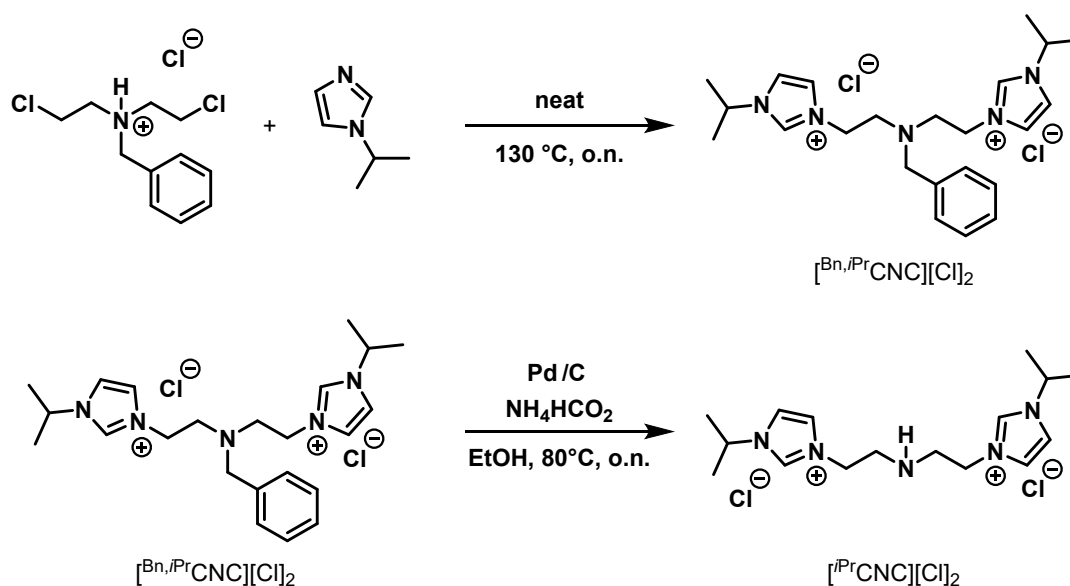

**Scheme S1.** Two-step proligand synthesis.

*Imidazole alkylation:* A 250 mL round-bottom flask equipped with a reflux-condenser was charged with a stir bar, *N*-benzyl-bis(2-chloroethyl)amine hydrochloride (6.00 g, 22.34 mmol, 1.00 eq.) and *N*-isopropylimidazole (17.5 g, 158 mmol, 7.10 eq.), before the suspension was stirred at 130 °C overnight. In the morning, the reaction mixture was allowed to cool to room temperature. The viscous orange-red solution was washed with Et<sub>2</sub>O in portions of 15 mL (stirred with specular), and the milky solution was decanted from the viscous orange material, until the Et<sub>2</sub>O fraction ran clear. Enough acetonitrile (MeCN) was added to fully dissolve the viscous material, and the MeCN solution was added to a 600 mL beaker containing 200 mL acetone. The mixture was stirred for approximately 1 hour until a white precipitate was formed. The orange suspension was filtered through a M-coarseness glass frit and the off-white solid was washed with acetone until the filtrate became colourless. The resulting colourless/white powder was dried on the frit for several hours in air, affording [<sup>Bn,i</sup>PrCNC][Cl]<sub>2</sub> in 88% yield (9.66 g, 19.8 mmol).

**<sup>1</sup>H-NMR** (400 MHz, DMSO-*d*<sub>6</sub>) δ (ppm) = 9.38 (d, <sup>3</sup>*J* = 1.8 Hz, 2H, *H*<sub>imi</sub>), 7.87 (t, <sup>3</sup>*J* = 1.8 Hz, 2H, *H*<sub>imi</sub>), 7.70 (t, <sup>3</sup>*J* = 1.8 Hz, 2H, *H*<sub>imi</sub>), 7.25 – 7.18 (broad multiplet, 3H, *H*<sub>arom</sub>), 6.98 – 6.92 (broad multiplet, 2H, *H*<sub>arom</sub>), 4.64 (hept, <sup>3</sup>*J* = 6.7 Hz, 2H, CH), 4.32 (t, <sup>3</sup>*J* = 6.3 Hz, 4H, CH<sub>2</sub>), 3.64 (s, 2H, CH<sub>2</sub>), 2.92 (t, <sup>3</sup>*J* = 6.3 Hz, 4H, CH<sub>2</sub>), 1.47 (d, <sup>3</sup>*J* = 6.7 Hz, 12H, CH<sub>3</sub>).

**<sup>13</sup>C-NMR** (101 MHz, DMSO-*d*<sub>6</sub>) δ (ppm) = 138.50, 135.32, 128.16, 128.12, 126.98, 122.85, 120.24, 57.31, 52.55, 52.13, 46.38, 22.43.

**HR-MS:** *m/z*: [M-Cl]<sup>+</sup> Calc for C<sub>23</sub>H<sub>35</sub>ClN<sub>5</sub> 416.2576; Found 416.2576, [M-2Cl]<sup>2+</sup> Calc for C<sub>23</sub>H<sub>35</sub>N<sub>5</sub> 190.6441; Found 190.6440, [M-2Cl-H]<sup>+</sup> Calc for C<sub>23</sub>H<sub>34</sub>N<sub>5</sub> 380.2809; Found 380.2809.

**Deprotection:**  $[\text{Bn},i\text{PrCNC}][\text{Cl}]_2$  (9.60 g, 19.6 mmol, 1.00 eq.) and  $\text{NH}_4\text{HCO}_2$  (20.0 g, 317 mmol, 16.1 eq.) were added to a 500 mL three-neck round-bottom flask equipped with two glass-stoppers and a reflux-condenser before being dissolved in EtOH (250 mL). The EtOH solution was sparged with argon-gas for 30 minutes before Pd/C (10%) (1.80 g, 15.7 mmol, 0.78 eq.) was added to the reaction mixture under argon counterflow. The suspension was refluxed under an argon-atmosphere overnight. After letting the black mixture cool to room temperature, the suspension was filtered through celite, and the pad was extracted with 2 x 20 mL more EtOH. Solvent was removed *in vacuo* from the combined filtrate to obtain  $[i\text{PrCNC}][\text{Cl}]_2$  as an off-white (later yellow) oil in 90% yield (7.05 g, 17.7 mmol).

**$^1\text{H-NMR}$**  (400 MHz,  $\text{DMSO-}d_6$ )  $\delta$  (ppm) = 9.61 (s, 2H,  $H_{\text{imi}}$ ), 7.91 (t,  $^3J = 1.8$  Hz, 2H,  $H_{\text{imi}}$ ), 7.84 (t,  $^3J = 1.8$  Hz, 2H,  $H_{\text{imi}}$ ), 4.65 (hept,  $^3J = 6.7$  Hz, 2H, CH), 4.26 (t,  $^3J = 5.8$  Hz, 4H,  $\text{CH}_2$ ), 2.98 (t,  $^3J = 5.8$  Hz, 4H,  $\text{CH}_2$ ), 1.48 (d,  $^3J = 6.7$  Hz, 12H,  $\text{CH}_3$ ).

**$^{13}\text{C-NMR}$**  (101 MHz,  $\text{DMSO-}d_6$ )  $\delta$  (ppm) = 135.42, 122.87, 120.16, 52.08, 48.31, 47.35, 22.40.

**HR-MS:**  $m/z$ :  $[\text{M-Cl}]^+$  Calc for  $\text{C}_{16}\text{H}_{29}\text{ClN}_5$  326.2106; Found 326.2106,  $[\text{M-2Cl}]^{2+}$  Calc for  $\text{C}_{16}\text{H}_{29}\text{N}_5$  145.6205; Found 145.6206,  $[\text{M-2Cl-H}]^+$  Calc for  $\text{C}_{16}\text{H}_{28}\text{N}_5$  290.2339; Found 290.2340.

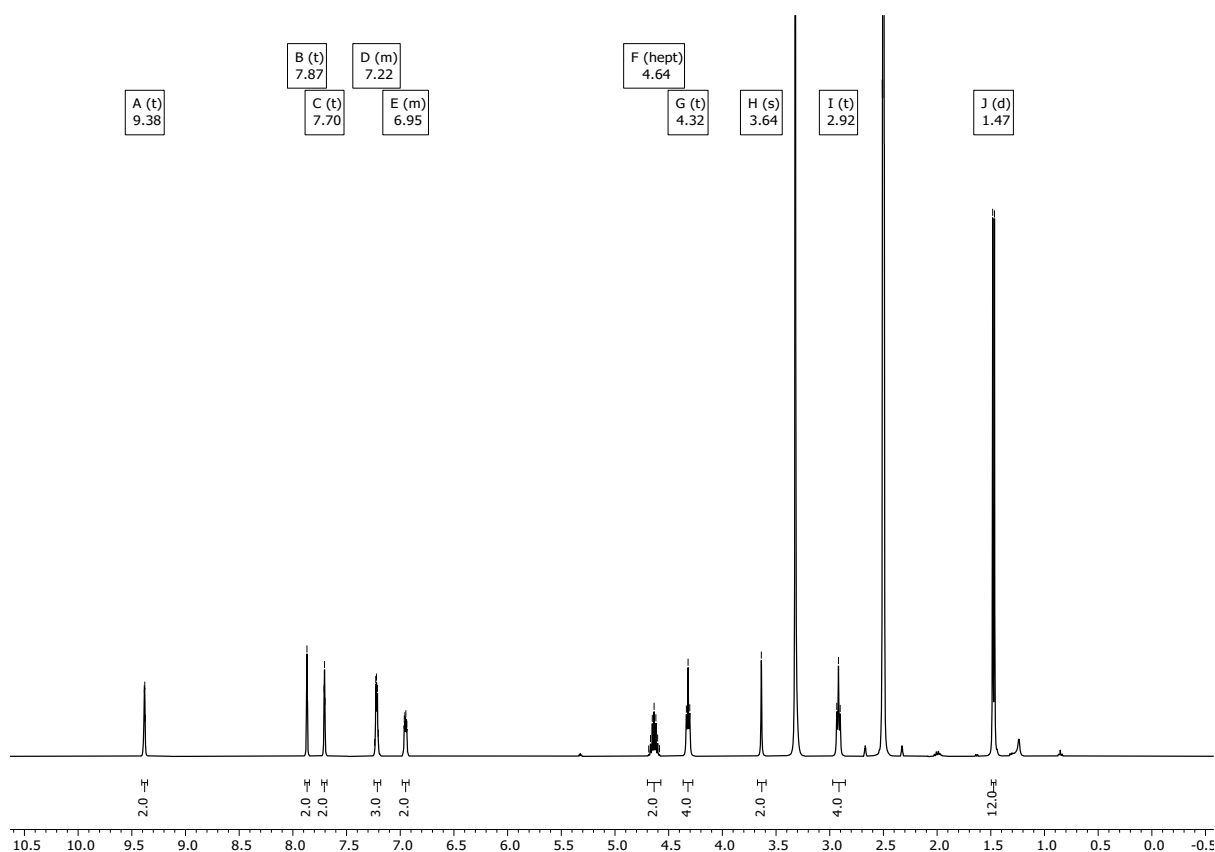

**Figure S1.**  $^1\text{H NMR}$  spectrum (400 MHz,  $\text{DMSO-}d_6$ ) of  $[\text{Bn},i\text{PrCNC}][\text{Cl}]_2$ .

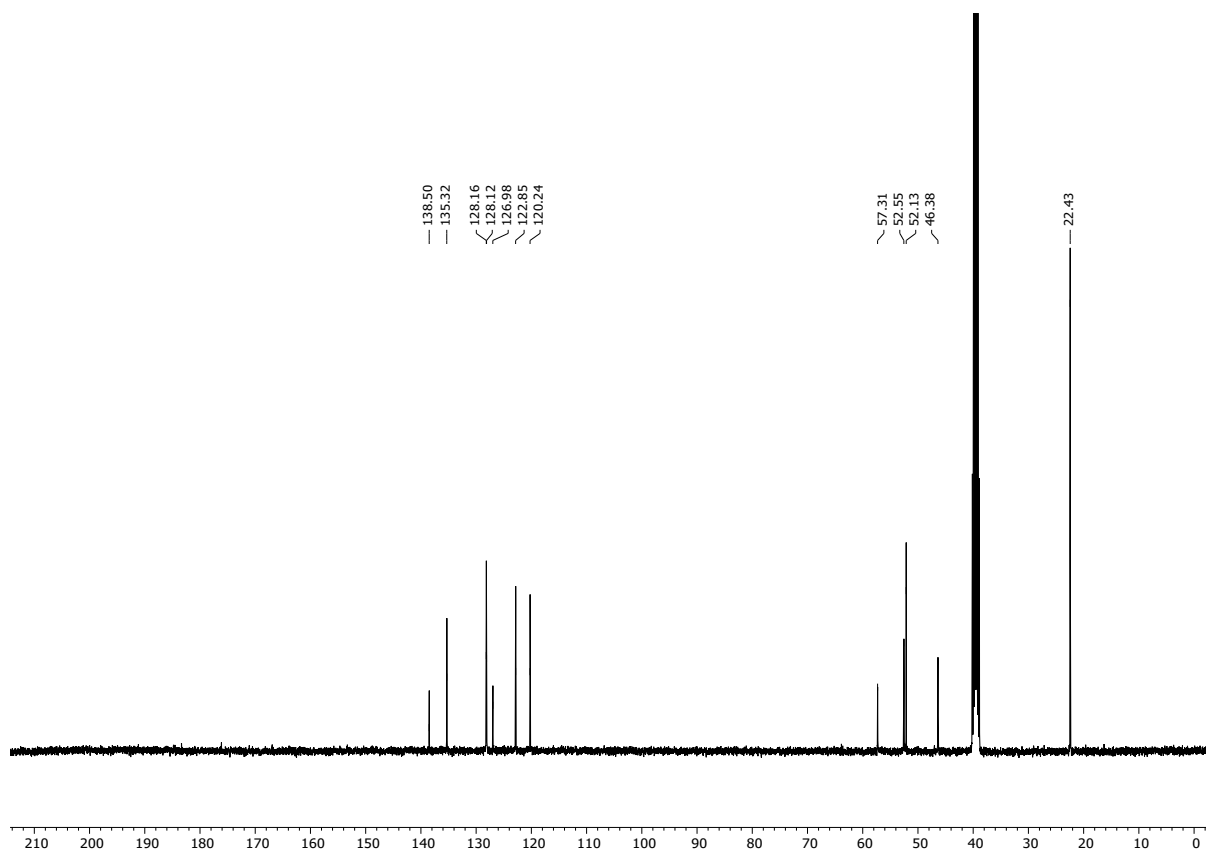

**Figure S2.**  $^{13}\text{C}\{^1\text{H}\}$  NMR spectrum (101 MHz,  $\text{DMSO-}d_6$ ) of  $[\text{Bn},i\text{PrCNC}][\text{Cl}]_2$ .

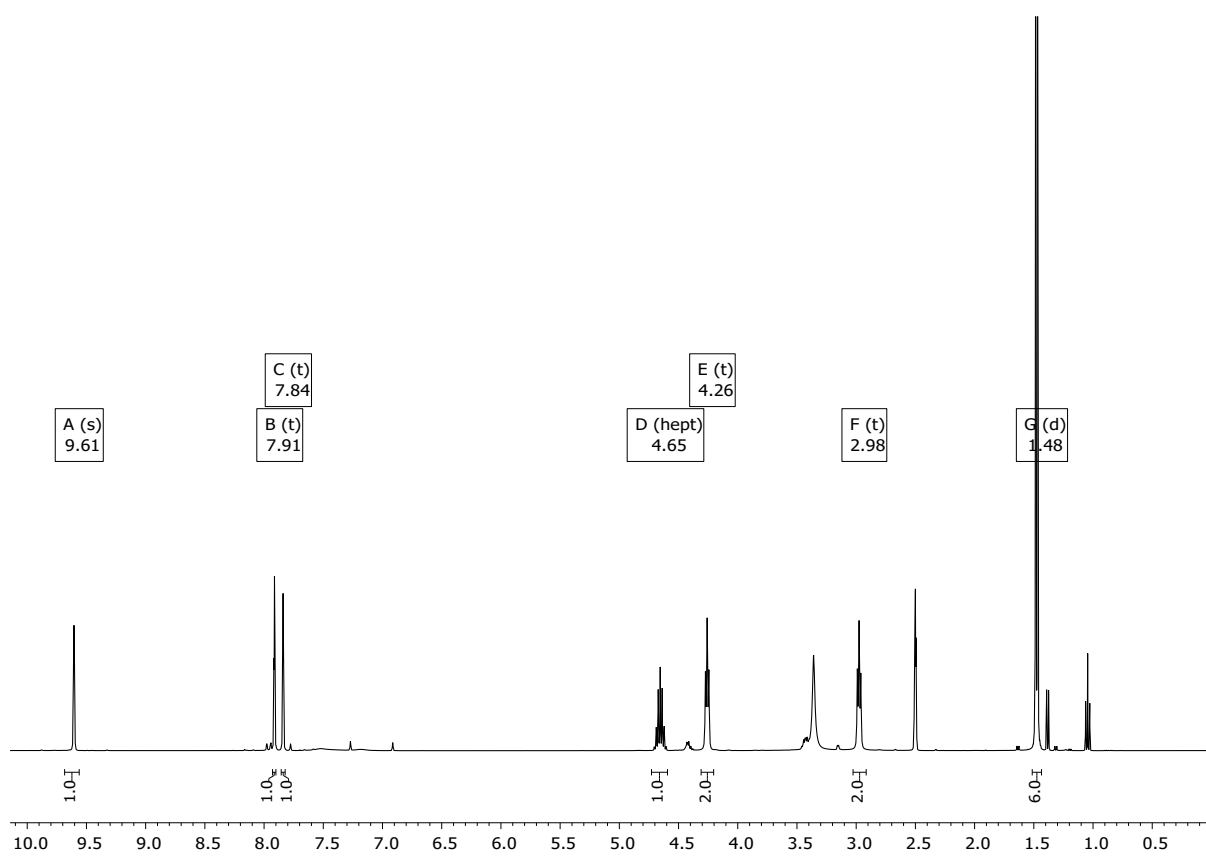

**Figure S3.**  $^1\text{H}$  NMR spectrum (400 MHz,  $\text{DMSO-}d_6$ ) of  $[i\text{PrCNC}][\text{Cl}]_2$ .

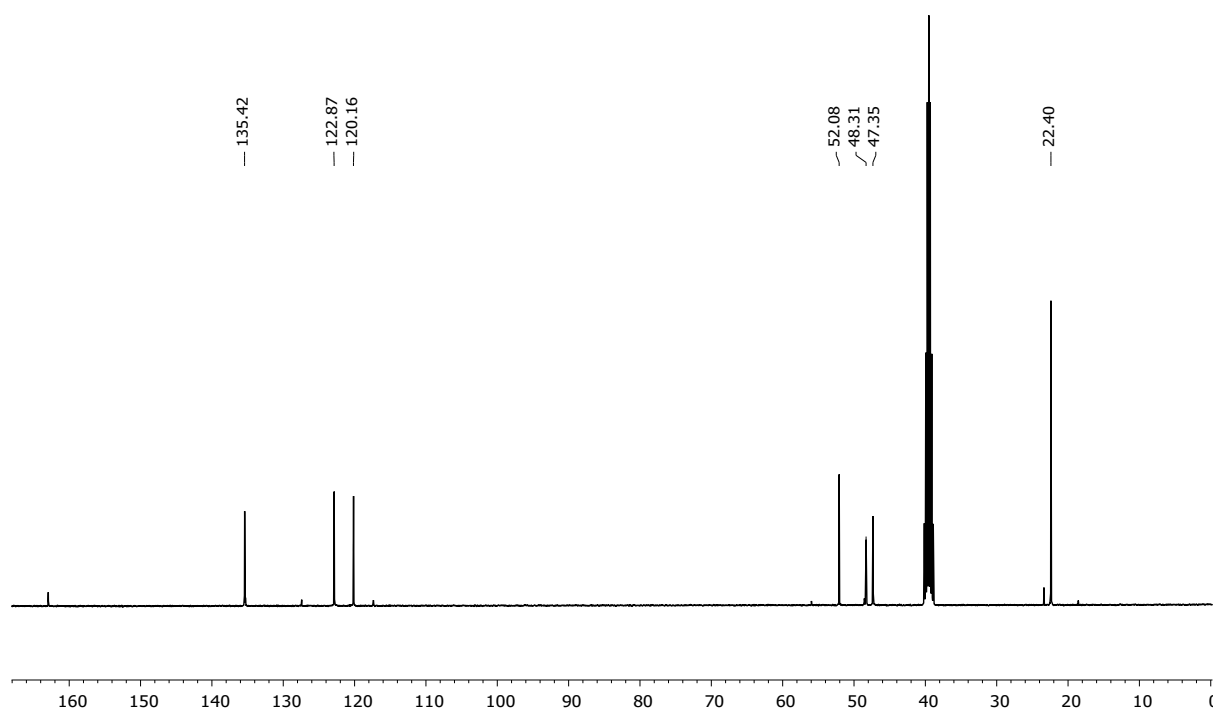

**Figure S4.**  $^{13}\text{C}\{^1\text{H}\}$  NMR spectrum (101 MHz,  $\text{DMSO-}d_6$ ) of  $[\text{iPrCNC}][\text{Cl}]_2$ .

### Synthesis of $i\text{PrCNC}(\text{AgCl})_2$

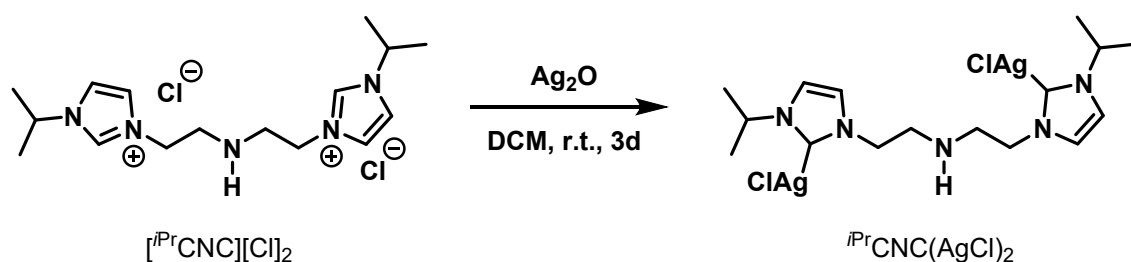

In a 250 mL round-bottom flask charged with a stirbar,  $[\text{iPrCNC}][\text{Cl}]_2$  (3.76 g, 10.39 mmol, 1.00 eq.) was suspended in DCM (40 mL) and  $\text{Ag}_2\text{O}$  (7.00 g, 30.21 mmol, 2.91 eq.) was added. The reaction flask was covered in aluminium foil and stirred for three days at room temperature. The resulting black suspension was filtered through celite and washed with DCM (15 mL). DCM was removed *in vacuo* affording an off-white foam, that turns metallic, red-brown after exposure to light (within minutes).

**$^1\text{H-NMR}$**  (400 MHz,  $\text{DMSO-}d_6$ )  $\delta$  (ppm) = 7.54 (d,  $^3J = 1.8$  Hz, 2H,  $H_{\text{imi}}$ ), 7.44 (d,  $^3J = 1.8$  Hz, 2H,  $H_{\text{imi}}$ ), 4.64 (hept,  $^3J = 6.8$  Hz, 2H, CH), 4.13 (t,  $^3J = 6.0$  Hz, 4H,  $\text{CH}_2$ ), 2.91 (q,  $^3J = 6.0$  Hz, 4H,  $\text{CH}_2$ ), 1.42 (d,  $^3J = 6.8$  Hz, 12H,  $\text{CH}_3$ ).

**$^{13}\text{C-NMR}$**  (101 MHz, DMSO)  $\delta$  (ppm) = 177.18 ( $\text{AgC}_{\text{imi}}$ ), 122.25 ( $\text{C}_{\text{imi}}$ ), 118.15 ( $\text{C}_{\text{imi}}$ ), 53.38 (CH), 50.99 ( $\text{CH}_2$ ), 49.61 ( $\text{CH}_2$ ), 23.36 ( $\text{CH}_3$ ). (+impurities+ DCM solvent signals).

**$^1\text{H-NMR}$**  (400 MHz, 298 K,  $\text{CD}_2\text{Cl}_2$ )  $\delta$  (ppm) = 7.19 (d,  $^3J = 1.8$  Hz, 2H,  $H_{\text{imi}}$ ), 7.06 (d,  $^3J = 2.0$  Hz, 2H,  $H_{\text{imi}}$ ), 4.74 (hept,  $^3J = 7.0$  Hz, 2H, CH), 4.19 (t,  $^3J = 6.0$  Hz, 4H,  $\text{CH}_2$ ), 3.02 (d,  $^3J = 6.1$  Hz, 4H,  $\text{CH}_2$ ), 1.46 (d,  $^3J = 6.8$  Hz, 12H,  $\text{CH}_3$ ).

Unable to establish an appropriate isotopic pattern from HR-MS following decomposition. The decomposition is also observed inside the glovebox.

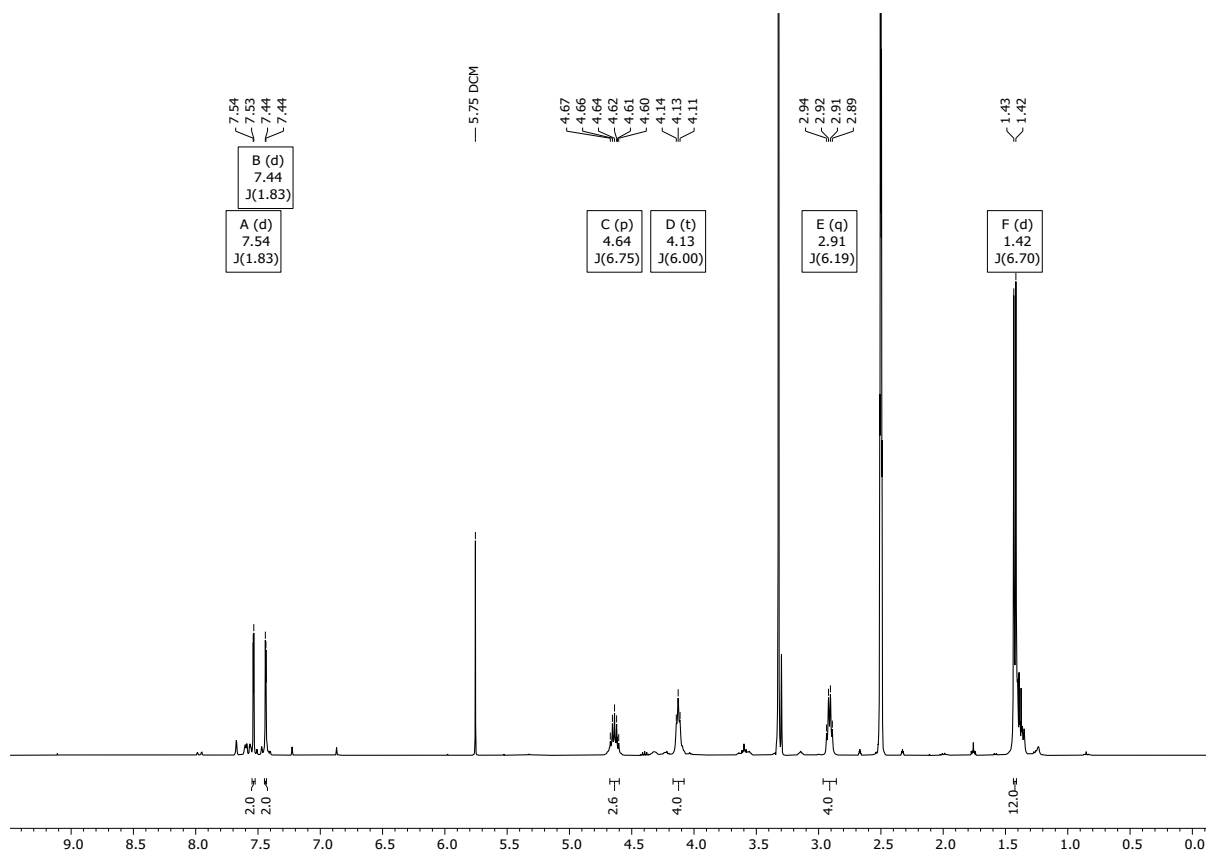

**Figure S5.**  $^1\text{H}$  NMR spectrum (400 MHz,  $\text{DMSO-}d_6$ ) of  $i\text{PrCNC(AgCl)}_2$ .

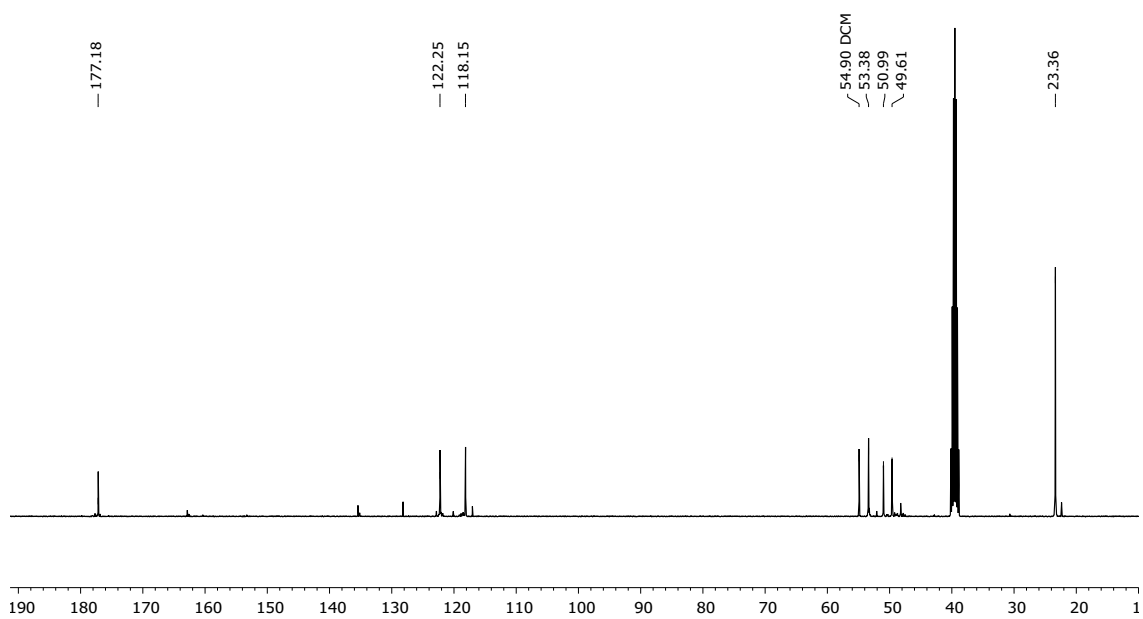

**Figure S6.**  $^{13}\text{C}\{^1\text{H}\}$  NMR spectrum (101 MHz,  $\text{DMSO-}d_6$ ) of  $i\text{PrCNC(AgCl)}_2$ .



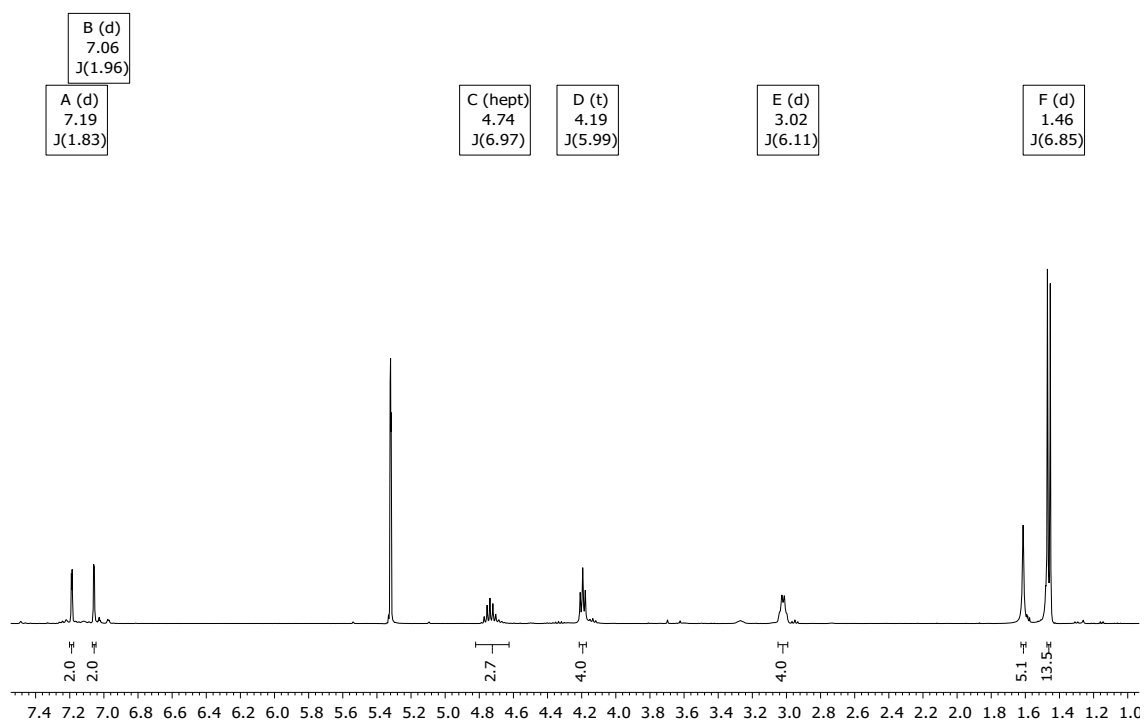

**Figure S7.**  $^1\text{H}$  NMR spectrum (400 MHz,  $\text{CD}_2\text{Cl}_2$ ) of  $^i\text{PrCNC}(\text{AgCl})_2$ .

## Synthesis of <sup>i</sup>PrCNC-Ru(Cl)<sub>2</sub>CO, Ru-1

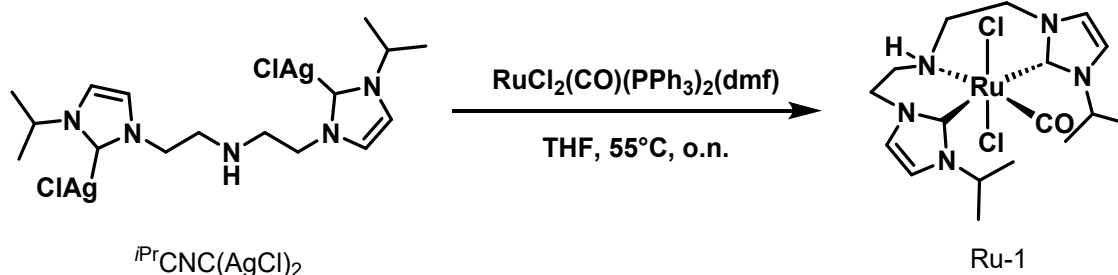

Inside the glovebox, a 50 mL bottom-flatten flask was charge with a stirbar, <sup>i</sup>PrCNC(AgCl)<sub>2</sub> (150 mg, 260.4 μmol, 1.00 eq.), and RuCl<sub>2</sub>(CO)(PPh<sub>3</sub>)<sub>2</sub>(dmf) (203.6 mg, 255.2 μmol, 0.98 eq.). The powders were suspended in dry THF (24 mL) and the flask was placed directly on-top of the stir plate, and the suspension was heated to 55 °C for up to 48 hours under vigorous stirring. The stirring was stopped, allowing the solids the solids were allowed to settle at the bottom, before the solution was passed through a Whatman glass filter fitted inside a glass Pasteur pipette (23 cm), affording a yellow filtrate that was collected in a 24 mL scintillation vial. Inside the glovebox all volatiles were removed *in vacuo*, the resulting yellowish solid was then brought outside of the glovebox, and the material was finally dissolved in MeOH (16 mL), which immediately causes most PPh<sub>3</sub> to precipitate out. The methanolic solution was collected *via* filtration and then concentrated to about 1 mL *in vacuo*, and the vial was then placed inside the refrigerator for 30 minutes before the dark supernatant was decanted off. The bright yellow crystals/powder was washed thrice more with cold MeOH (0 °C, 3 x 0.3 mL), or until the liquid no longer had a dark discolouring to it, and the powder was finally washed thrice with dry Et<sub>2</sub>O (3 x 20 mL). The yellow powder was dissolved in as little volume MeOH possible, passed through a Whatman glass filter, concentrated to no more than a milliliter *in vacuo*, precipitated with enough Et<sub>2</sub>O, and the liquid was removed before the solid was placed to dry *in vacuo* for a couple of hours affording **Ru-1** in up-to 38% yield (48.3 mg, 99 μmol). Crystals suitable for single-crystal X-ray diffraction were obtained from either 1) layering of Et<sub>2</sub>O into a concentrated THF solution of **Ru-1** or 2) from slow solvent evaporation from a concentration methanolic solution of **Ru-1**.

**<sup>1</sup>H-NMR** (800 MHz, CD<sub>3</sub>CN) δ (ppm) = 7.18 (d, <sup>3</sup>J = 1.9 Hz, 2H, H<sub>imi</sub>), 7.10 (d, <sup>3</sup>J = 1.9 Hz, 2H, H<sub>imi</sub>), 5.49 (hept, <sup>3</sup>J = 6.8 Hz, 2H, CH), 4.86 (ddd, <sup>3</sup>J = 14.1, 8.5, 3.5 Hz, 2H, CH<sub>2</sub>), 4.22 (ddd, <sup>3</sup>J = 14.1, 5.8, 3.5 Hz, 2H, CH<sub>2</sub>), 4.07 (s, 1H, NH), 3.42 – 3.33 (m, 2H, CH<sub>2</sub>), 3.03 – 2.97 (m, 2H, CH<sub>2</sub>), 1.50 (d, <sup>3</sup>J = 6.8 Hz, 6H, CH<sub>3</sub>), 1.47 (d, <sup>3</sup>J = 6.8 Hz, 6H, CH<sub>3</sub>).

**<sup>13</sup>C NMR** (201 MHz, CD<sub>3</sub>CN) δ (ppm) = 208.78 (Ru-CO), 183.97 (Ru-C(NHC)), 123.63 (C<sub>imi</sub>), 117.54 (C<sub>imi</sub>), 51.99 (CH<sub>2</sub>), 51.97 (CH), 48.63 (CH<sub>2</sub>), 24.50 (CH<sub>3</sub>), 24.28 (CH<sub>3</sub>).

**HR-MS:** m/z: [M-Cl]<sup>+</sup> Calc for RuON<sub>5</sub>ClC<sub>17</sub>H<sub>27</sub> 454.0942, Found 454.0942.

A biproduct that we sometime observe from this reaction is [AgClPPh<sub>3</sub>]<sub>4</sub> as white crystals, that was removed *via* mechanical separation as this compound shares similar solubility properties as **Ru-1**. The yellow powder was recrystallized from a concentrated MeOH solution at -18°C. When small colourless crystals formed alongside the desired long yellow needles, as seen in below image, the two types of crystals were separated by mechanical sieving.

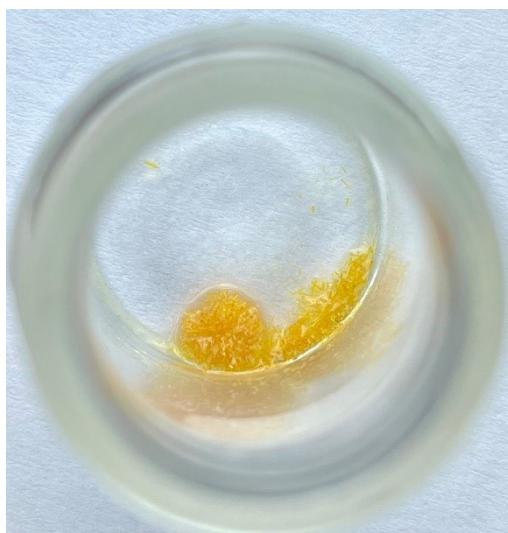

The IR spectrum of **Ru-1** features a medium-intensity and a strong-intensity absorption band attributed to the characteristic stretching frequencies of the amino ( $3129\text{ cm}^{-1}$ ) and carbonyl ( $1915\text{ cm}^{-1}$ ) functional groups, respectively (**Figure S8**). No absorption resonance at  $1639\text{ cm}^{-1}$  relating to the precursor was detected.<sup>1</sup>

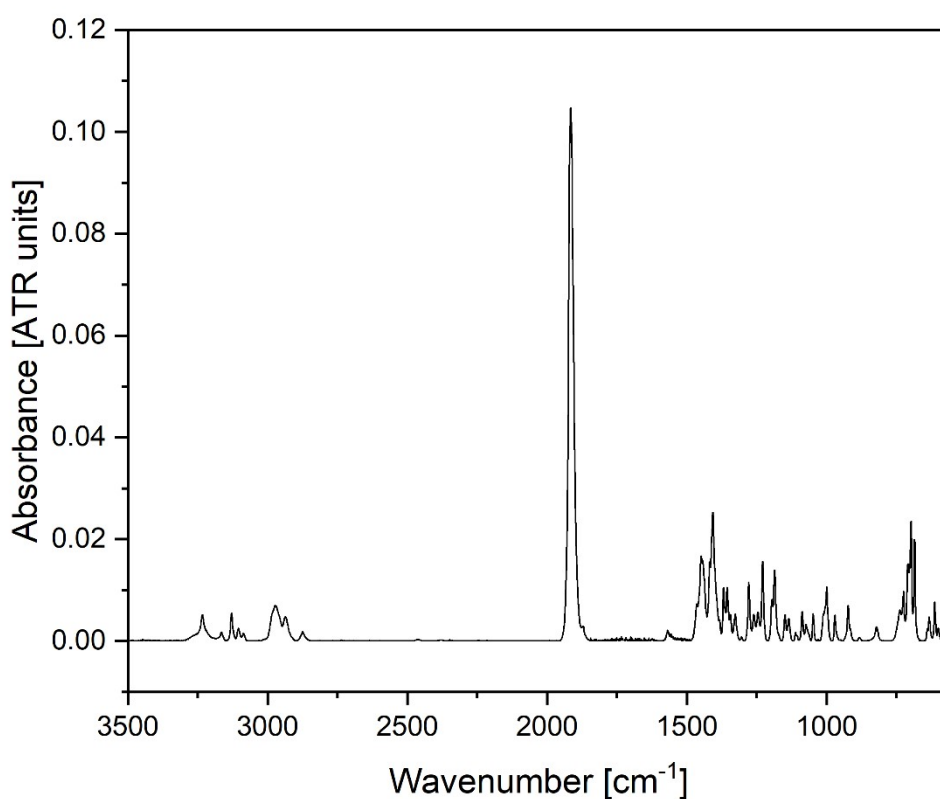

**Figure S8.** FTIR spectrum of **Ru-1**.

| Wavenumber / $\text{cm}^{-1}$ | Absolute Intensity / A.U |
|-------------------------------|--------------------------|
| 3233                          | 0,005                    |
| 3164                          | 0,002                    |
| 3129                          | 0,005                    |
| 3104                          | 0,003                    |
| 3087                          | 0,001                    |

|           |       |
|-----------|-------|
| 2974      | 0,007 |
| 2936      | 0,005 |
| 2875      | 0,002 |
| 1915 (CO) | 0,105 |
| 1569      | 0,002 |
| 1449      | 0,017 |
| 1407      | 0,025 |
| 1369      | 0,011 |
| 1356      | 0,011 |
| 1327      | 0,005 |
| 1278      | 0,012 |
| 1260      | 0,005 |
| 1246      | 0,006 |
| 1229      | 0,016 |
| 1186      | 0,014 |
| 1149      | 0,005 |
| 1136      | 0,004 |
| 1111      | 0,002 |
| 1087      | 0,006 |
| 1074      | 0,003 |
| 1048      | 0,005 |
| 999       | 0,011 |
| 970       | 0,005 |
| 923       | 0,007 |
| 882       | 0,001 |
| 822       | 0,003 |
| 725       | 0,01  |
| 697       | 0,024 |
| 685       | 0,02  |
| 633       | 0,005 |
| 613       | 0,008 |

The aromatic region features two characteristic narrow doublets ( $J \sim 2$  Hz), signals A and B, corresponding to the C4 and C5 of the imidazole-2-ylidene moieties. The *i*Pr wingtips give rise to three distinctive signals, namely signals C (heptet), I (doublet), and J (doublet), owing to the methine and two chemically inequivalent methyl groups, respectively. From the  $\{^1\text{H}-^1\text{H}\}$  COSY NMR spectrum (**Figure S10**) we establish that the remaining signals, D (ddd), E (ddd), G (m), and H (m) can be attributed to the ethyl linkers and the broad signal F (s), lacking any fine structure, is consistent with the amino proton. Moreover, because of the absence of off-diagonal elements in the COSY spectrum with signal F, we can assign signals D and E to the diastereotopic methylene protons adjacent to the NHC-moiety. Signals G and H, on the other hand, feature this cross-peak, and can thus be assigned to the methylene protons adjacent to the amino group and help explain the complex multiplicity observed in **Figure S9**. Importantly, no residual triphenylphosphine is observed (**Figure S14**).

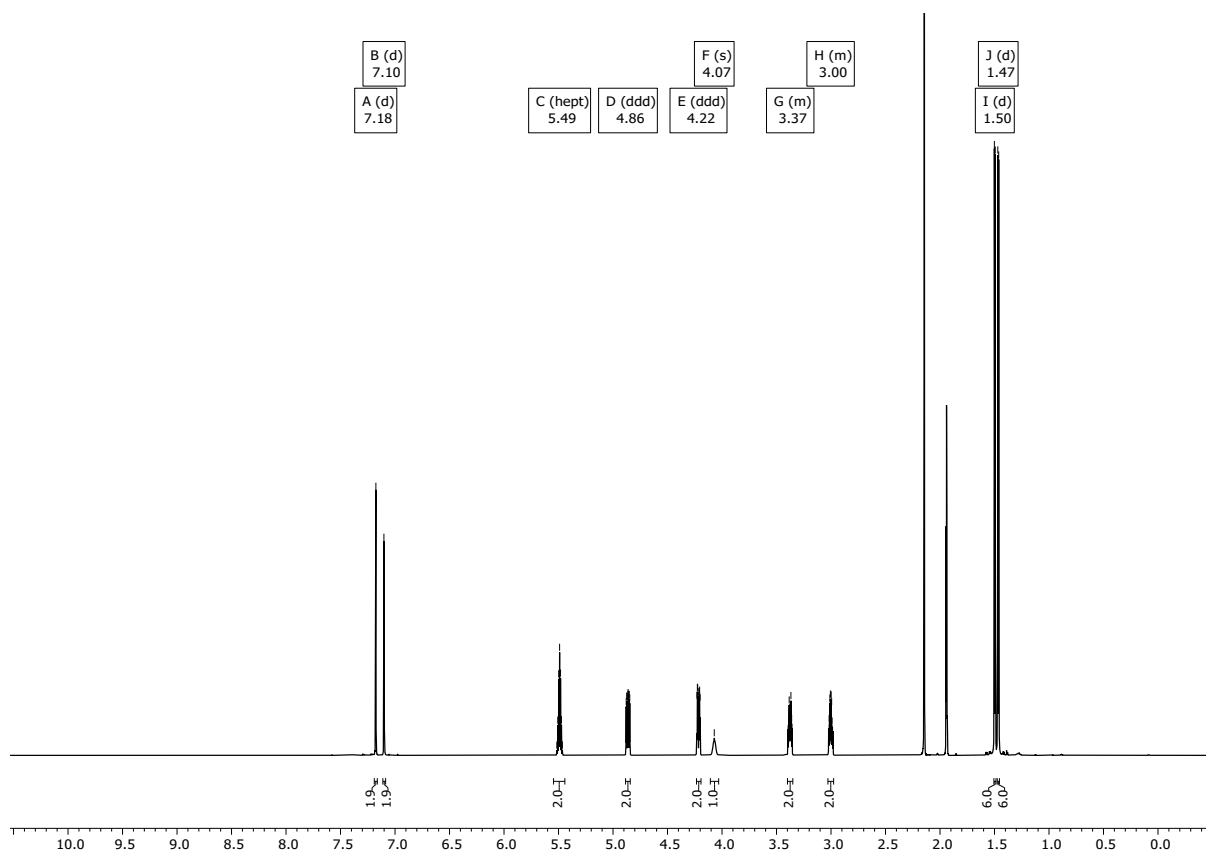

**Figure S9.**  $^1\text{H}$  NMR spectrum (800 MHz,  $\text{CD}_3\text{CN}$ ) of **Ru-1**.

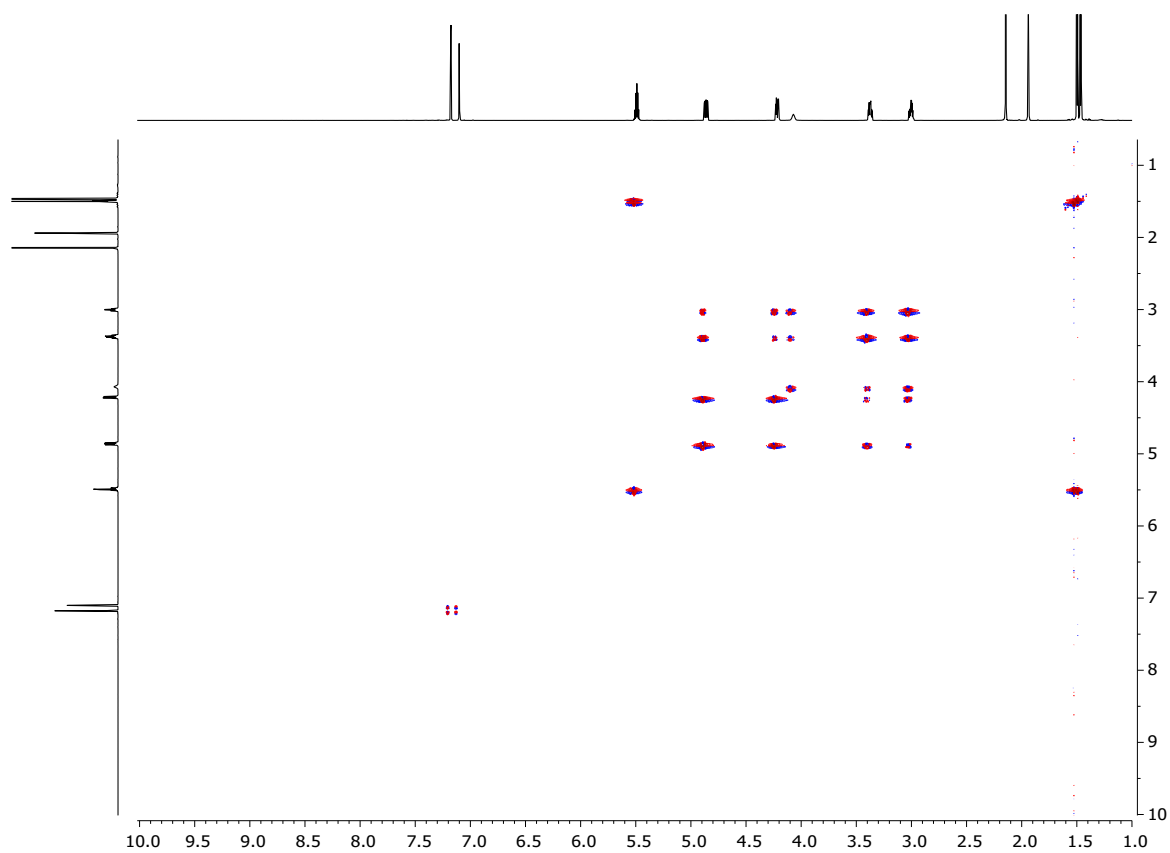

**Figure S10.**  $\{^1\text{H}-^1\text{H}\}$  COSY NMR spectrum (800 MHz,  $\text{CD}_3\text{CN}$ ) of **Ru-1**.

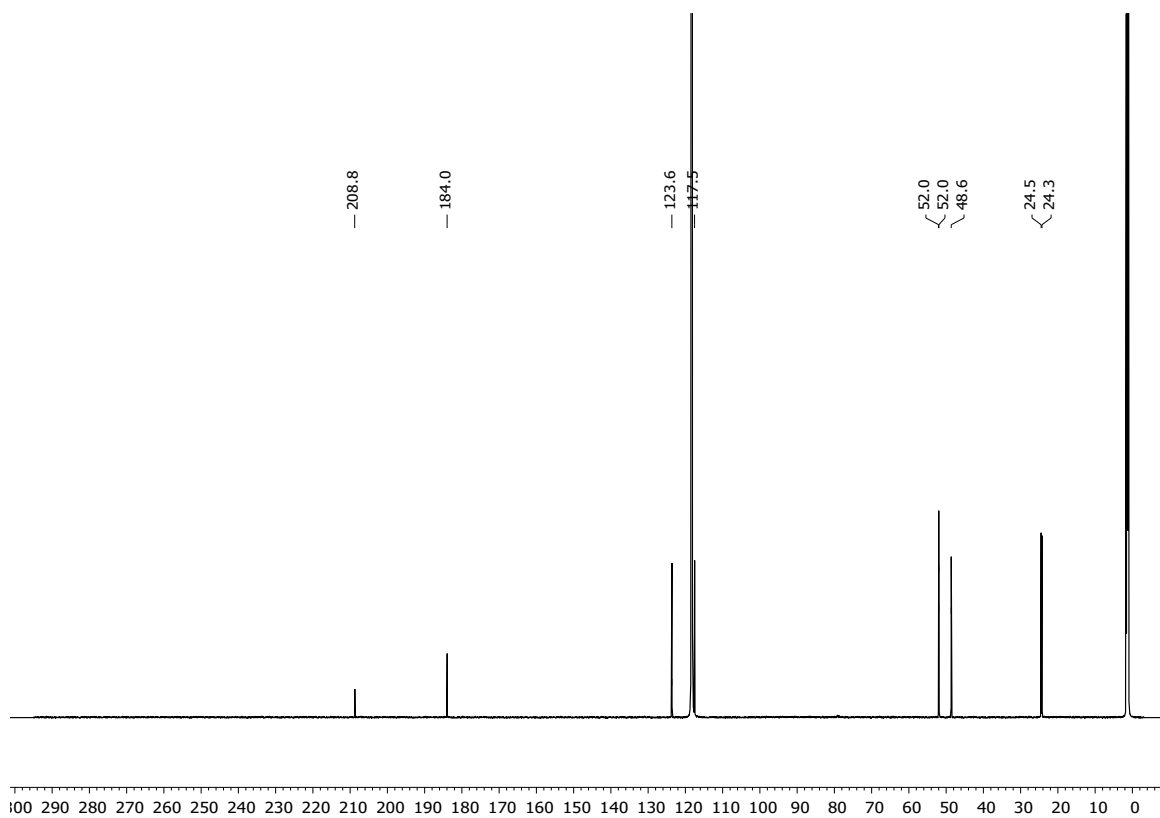

**Figure S11.**  $^{13}\text{C}\{^1\text{H}\}$  NMR spectrum (201 MHz,  $\text{CD}_3\text{CN}$ ) of **Ru-1**.

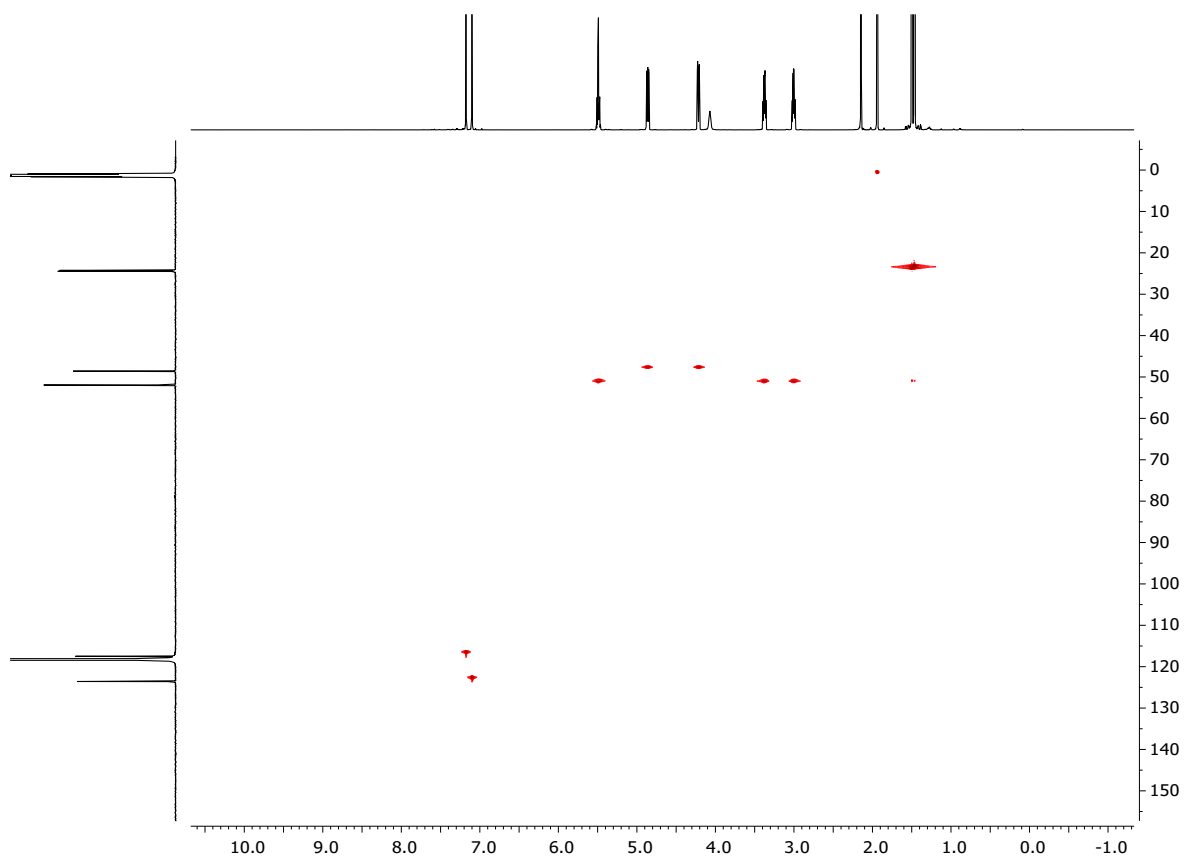

**Figure S12.**  $\{^1\text{H}-^{13}\text{C}\}$  HSQC NMR spectrum (800 MHz,  $\text{CD}_3\text{CN}$ ) of **Ru-1**.

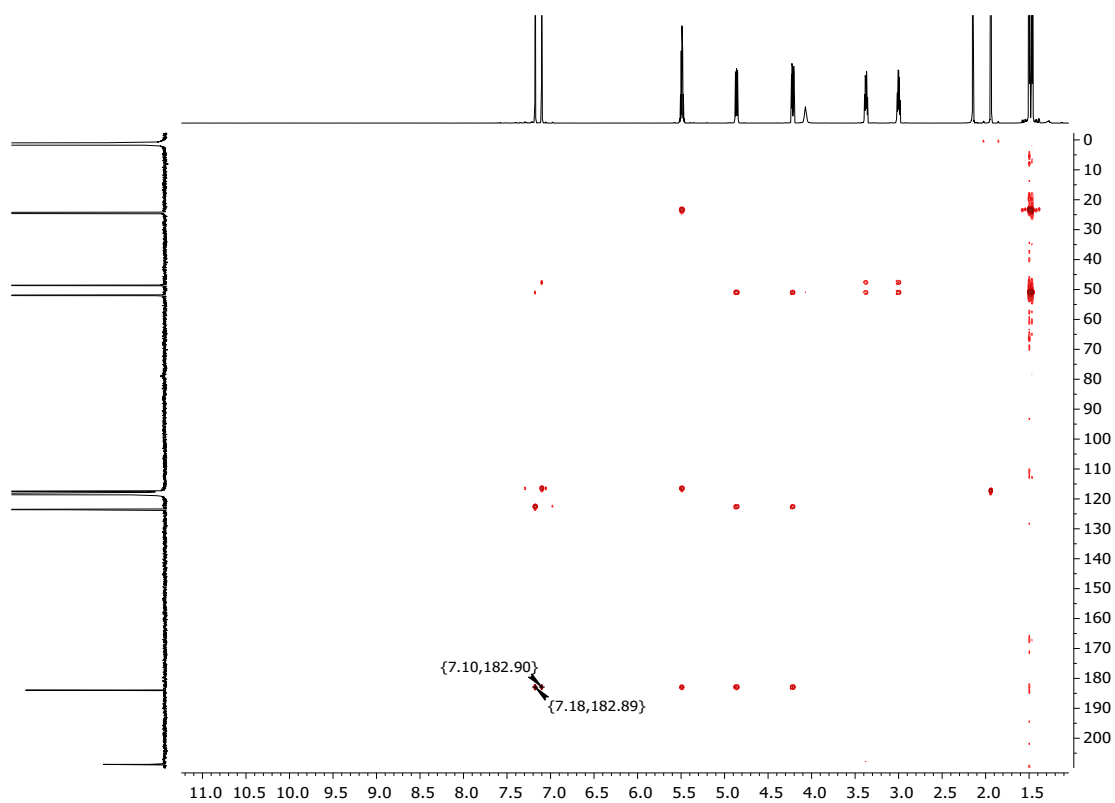

**Figure S13**  $\{^1\text{H}-^{13}\text{C}\}$  HMBC NMR spectrum (800 MHz,  $\text{CD}_3\text{CN}$ ) of **Ru-1**.

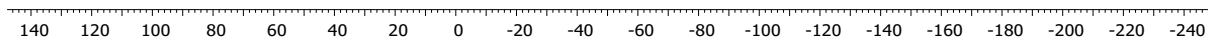

**Figure S14.**  $^{31}\text{P}\{^1\text{H}\}$  NMR spectrum (162 MHz,  $\text{CD}_3\text{CN}$ ) of **Ru-1**

The bonding metrics of the imidazole-2-ylidene moieties, e.g., the N-C(NHC)-N and C=C bond lengths, are consistent with those observed in other NHC-bearing complexes, see **Tables S2 to S4**.<sup>18–22</sup>

**Table S1.** Crystallographic data for **Ru-1**.

| <b>Ru-1</b>                                       |                                                                    |
|---------------------------------------------------|--------------------------------------------------------------------|
| <b>Empirical formula</b>                          | C <sub>17</sub> H <sub>27</sub> Cl <sub>2</sub> N <sub>5</sub> ORu |
| <b>Formula weight (g/mol)</b>                     | 489.40                                                             |
| <b>Temperature (K)</b>                            | 119.99(18)                                                         |
| <b>Crystal system</b>                             | monoclinic                                                         |
| <b>Space group</b>                                | P2 <sub>1</sub> /c                                                 |
| <b>a (Å)</b>                                      | 10.1376(2)                                                         |
| <b>b (Å)</b>                                      | 15.2198(2)                                                         |
| <b>c (Å)</b>                                      | 13.6429(2)                                                         |
| <b>α (deg)</b>                                    | 90                                                                 |
| <b>β (deg)</b>                                    | 93.669(10)                                                         |
| <b>γ (deg)</b>                                    | 90                                                                 |
| <b>Volume (Å<sup>3</sup>)</b>                     | 2100.68(6)                                                         |
| <b>Z</b>                                          | 4                                                                  |
| <b>ρ<sub>calc</sub> (g/cm<sup>3</sup>)</b>        | 1.547                                                              |
| <b>μ (mm<sup>-1</sup>)</b>                        | 8.511                                                              |
| <b>F(000)</b>                                     | 1000.0                                                             |
| <b>Crystal size / mm<sup>3</sup></b>              | 0.029 × 0.019 × 0.017                                              |
| <b>Radiation</b>                                  | Cu Kα (λ = 1.54184)                                                |
| <b>2θ range for data collection (deg)</b>         | 8.714 to 140.098                                                   |
| <b>Index ranges</b>                               | -12 ≤ h ≤ 12, -18 ≤ k ≤ 18, -16 ≤ l ≤ 16                           |
| <b>Reflections collected</b>                      | 41312                                                              |
| <b>Independent reflections</b>                    | 3994 [R <sub>int</sub> = 0.0769, R <sub>sigma</sub> = 0.0296]      |
| <b>Data/restraints/parameters</b>                 | 3994/0/239                                                         |
| <b>Goodness-of-fit on F<sup>2</sup></b>           | 1.041                                                              |
| <b>Final R indexes [I ≥ 2σ (I)]</b>               | R <sub>1</sub> = 0.0340, wR <sub>2</sub> = 0.0861                  |
| <b>Final R indexes [all data]</b>                 | R <sub>1</sub> = 0.0379, wR <sub>2</sub> = 0.0882                  |
| <b>Largest diff. peak/hole / e Å<sup>-3</sup></b> | 1.67/-0.95                                                         |

**Table S2.** Bond Lengths from crystallographic data for **Ru-1**.

| <b>Atom</b> | <b>Atom</b> | <b>Length/Å</b> | <b>Atom</b> | <b>Atom</b> | <b>Length/Å</b> |
|-------------|-------------|-----------------|-------------|-------------|-----------------|
| Ru01        | Cl02        | 2.4188(7)       | O007        | C00L        | 1.149(5)        |



|      |      |           |      |      |          |
|------|------|-----------|------|------|----------|
| Ru01 | Cl03 | 2.4319(7) | N008 | C009 | 1.357(4) |
| Ru01 | C009 | 2.096(3)  | N008 | C00G | 1.474(4) |
| Ru01 | C00A | 2.105(3)  | N008 | C00M | 1.389(4) |
| Ru01 | N00C | 2.247(3)  | C00B | C00E | 1.344(4) |
| Ru01 | C00L | 1.817(4)  | N00C | C00F | 1.459(4) |
| N004 | C00A | 1.359(4)  | N00C | C00I | 1.468(4) |
| N004 | C00B | 1.383(4)  | C00D | C00N | 1.514(4) |
| N004 | C00J | 1.457(4)  | C00D | C00Q | 1.530(4) |
| N005 | C00A | 1.362(4)  | C00F | C00J | 1.507(4) |
| N005 | C00D | 1.479(4)  | C00G | C00O | 1.524(4) |
| N005 | C00E | 1.387(4)  | C00G | C00P | 1.520(4) |
| N006 | C009 | 1.361(4)  | C00H | C00I | 1.510(4) |
| N006 | C00H | 1.460(4)  | C00K | C00M | 1.331(5) |
| N006 | C00K | 1.382(4)  |      |      |          |

**Table S3.** Bond Angles.

| Atom | Atom | Atom | Angle/°    | Atom | Atom | Atom | Angle/°  |
|------|------|------|------------|------|------|------|----------|
| Cl02 | Ru01 | Cl03 | 175.35(3)  | C00M | N008 | C00G | 123.1(3) |
| C009 | Ru01 | Cl02 | 89.13(8)   | N006 | C009 | Ru01 | 122.9(2) |
| C009 | Ru01 | Cl03 | 92.49(8)   | N008 | C009 | Ru01 | 132.9(2) |
| C009 | Ru01 | C00A | 173.21(11) | N008 | C009 | N006 | 104.1(3) |
| C009 | Ru01 | N00C | 84.03(11)  | N004 | C00A | Ru01 | 123.1(2) |
| C00A | Ru01 | Cl02 | 91.59(8)   | N004 | C00A | N005 | 103.9(2) |
| C00A | Ru01 | Cl03 | 86.30(8)   | N005 | C00A | Ru01 | 133.0(2) |
| C00A | Ru01 | N00C | 89.38(11)  | C00E | C00B | N004 | 106.8(3) |
| N00C | Ru01 | Cl02 | 81.77(10)  | C00F | N00C | Ru01 | 118.4(2) |
| N00C | Ru01 | Cl03 | 94.06(10)  | C00F | N00C | C00I | 112.1(3) |
| C00L | Ru01 | Cl02 | 93.56(11)  | C00I | N00C | Ru01 | 120.6(2) |

| Atom | Atom | Atom | Angle/°    | Atom | Atom | Atom | Angle/°  |
|------|------|------|------------|------|------|------|----------|
| C00L | Ru01 | Cl03 | 90.75(11)  | N005 | C00D | C00N | 109.6(3) |
| C00L | Ru01 | C009 | 91.58(13)  | N005 | C00D | C00Q | 110.4(3) |
| C00L | Ru01 | C00A | 95.12(12)  | C00N | C00D | C00Q | 112.0(3) |
| C00L | Ru01 | N00C | 173.62(14) | C00B | C00E | N005 | 106.7(2) |
| C00A | N004 | C00B | 111.4(2)   | N00C | C00F | C00J | 111.3(2) |
| C00A | N004 | C00J | 125.3(2)   | N008 | C00G | C00O | 109.9(3) |
| C00B | N004 | C00J | 123.2(2)   | N008 | C00G | C00P | 110.6(3) |
| C00A | N005 | C00D | 126.4(2)   | C00P | C00G | C00O | 112.3(3) |
| C00A | N005 | C00E | 111.2(2)   | N006 | C00H | C00I | 112.4(2) |
| C00E | N005 | C00D | 122.4(2)   | N00C | C00I | C00H | 116.5(3) |
| C009 | N006 | C00H | 123.5(2)   | N004 | C00J | C00F | 113.0(2) |
| C009 | N006 | C00K | 111.3(3)   | C00M | C00K | N006 | 106.5(3) |
| C00K | N006 | C00H | 124.9(3)   | O007 | C00L | Ru01 | 177.5(3) |
| C009 | N008 | C00G | 126.1(3)   | C00K | C00M | N008 | 107.6(3) |
| C009 | N008 | C00M | 110.4(3)   |      |      |      |          |

**Table S4.** Torsion Angles.

| A    | B    | C    | D    | Angle/°   | A    | B    | C    | D    | Angle/°   |
|------|------|------|------|-----------|------|------|------|------|-----------|
| Ru01 | N00C | C00F | C00J | -47.1(3)  | C00E | N005 | C00A | Ru01 | -179.4(2) |
| Ru01 | N00C | C00I | C00H | -12.7(4)  | C00E | N005 | C00A | N004 | 1.4(3)    |
| N004 | C00B | C00E | N005 | 0.5(3)    | C00E | N005 | C00D | C00N | 73.8(4)   |
| N006 | C00H | C00I | N00C | 61.0(4)   | C00E | N005 | C00D | C00Q | -50.0(4)  |
| N006 | C00K | C00M | N008 | 0.0(4)    | C00F | N00C | C00I | C00H | 134.1(3)  |
| C009 | N006 | C00H | C00I | -52.2(4)  | C00G | N008 | C009 | Ru01 | 10.7(4)   |
| C009 | N006 | C00K | C00M | 0.8(4)    | C00G | N008 | C009 | N006 | -171.8(3) |
| C009 | N008 | C00G | C00O | 110.3(3)  | C00G | N008 | C00M | C00K | 172.5(3)  |
| C009 | N008 | C00G | C00P | -125.3(3) | C00H | N006 | C009 | Ru01 | -9.1(4)   |

| A    | B    | C    | D    | Angle/°    | A    | B    | C    | D    | Angle/°   |
|------|------|------|------|------------|------|------|------|------|-----------|
| C009 | N008 | C00M | C00K | -0.8(4)    | C00H | N006 | C009 | N008 | 173.1(3)  |
| C00A | N004 | C00B | C00E | 0.4(3)     | C00H | N006 | C00K | C00M | -173.5(3) |
| C00A | N004 | C00J | C00F | -50.2(4)   | C00I | N00C | C00F | C00J | 165.2(3)  |
| C00A | N005 | C00D | C00N | -106.8(3)  | C00J | N004 | C00A | Ru01 | -2.5(4)   |
| C00A | N005 | C00D | C00Q | 129.4(3)   | C00J | N004 | C00A | N005 | 176.8(2)  |
| C00A | N005 | C00E | C00B | -1.3(3)    | C00J | N004 | C00B | C00E | -177.5(3) |
| C00B | N004 | C00A | Ru01 | 179.64(19) | C00K | N006 | C009 | Ru01 | 176.5(2)  |
| C00B | N004 | C00A | N005 | -1.1(3)    | C00K | N006 | C009 | N008 | -1.3(3)   |
| C00B | N004 | C00J | C00F | 127.4(3)   | C00K | N006 | C00H | C00I | 121.4(3)  |
| N00C | C00F | C00J | N004 | 75.9(3)    | C00M | N008 | C009 | Ru01 | -176.2(2) |
| C00D | N005 | C00A | Ru01 | 1.1(4)     | C00M | N008 | C009 | N006 | 1.3(3)    |
| C00D | N005 | C00A | N004 | -178.0(2)  | C00M | N008 | C00G | C00O | -62.0(4)  |
| C00D | N005 | C00E | C00B | 178.2(2)   | C00M | N008 | C00G | C00P | 62.5(4)   |

## FADH Catalysis

### General procedure for FADH

A three-neck round-bottom flask (25 or 50 mL) equipped with a cross-shaped magnetic stir bar, a reflux-condenser on the middle neck, a rubber septum on one side and a tube connected to a bubbler on the other side, was flushed with argon via the condenser. The gas flow through the flask was adjusted to a constant low flow. Once ready, the rubber septum was briefly removed to charge the flask with the desired amount of catalyst (0.025, 0.05 or 0.1 mol%) and 1 mL of the desired IL. The mixture was stirred in an oil bath at the chosen temperature (80, 90, 100 °C) under continuous stirring (400 rpm) until complete solubilisation of the catalyst was achieved (3-6 minutes). Then, FA (typically 0.5 mL) was slowly added through the rubber septum and the starting time was recorded. For monitoring the FA consumption, samples of the reaction mixture were taken at different time points (typically 15, 30, 35, 60, 90, 120, 180 min), by inserting the tip of a glass pipette into the reaction mixture and then flushing the sample into an NMR tube with deuterated DMSO. The samples were analysed via <sup>1</sup>H-NMR analysis. The imidazolium proton signals (at 7.00 and 7.77 ppm) of the IL were used as internal reference.

### Procedure for FADH cycles

The first FADH cycle was performed as described in the general procedure. After the cycle was completed (indicated by the absence of FA in the NMR spectrum of the last sample), the reaction flask was continued to be stirred at the same temperature and under a constant low argon flow until the next cycle was started the following day(s). For initiating the next cycle,

the desired amount of FA was added and the starting time was recorded. Samples were taken at various time points to monitor the FA consumption, following the same procedure as in the first cycle. The same methodology was applied to all subsequent cycles.

### TON/TOF calculation

The turnover numbers were calculated using the following formula:

$$TON = \frac{n (FA)_{start}}{n (catalyst)} \times conversion$$

The turnover frequencies were calculated using the following formula:

$$TOF = \frac{n (FA)_{start}}{n (catalyst)} \times conversion \times \frac{1}{t [h]}$$

For the time of TOF<sub>max</sub>, the timeframe was chosen in which the conversion per unit time was highest (i.e., where the conversion/timeline was the steepest).

**Table S5. Control experiment.** FA over time in EMIM PO<sub>2</sub>(OEt)<sub>2</sub> at 90 °C.

| Entry | Time               | Conv. [%] <sup>b</sup> |
|-------|--------------------|------------------------|
| 1     | 0 min <sup>c</sup> | 1                      |
| 2     | 10 min             | 2                      |
| 3     | 3 h                | 2                      |

<sup>a</sup>Reaction conditions: EMIM PO<sub>2</sub>(OEt)<sub>2</sub> (1 mL), FA (13.3 mmol, 0.5 mL), 90 °C, under gentle flow of nitrogen. NMR error margin of 10%. <sup>b</sup>Determined by <sup>1</sup>H-NMR. <sup>c</sup>Sampled before heating, after mixing FA and the IL.

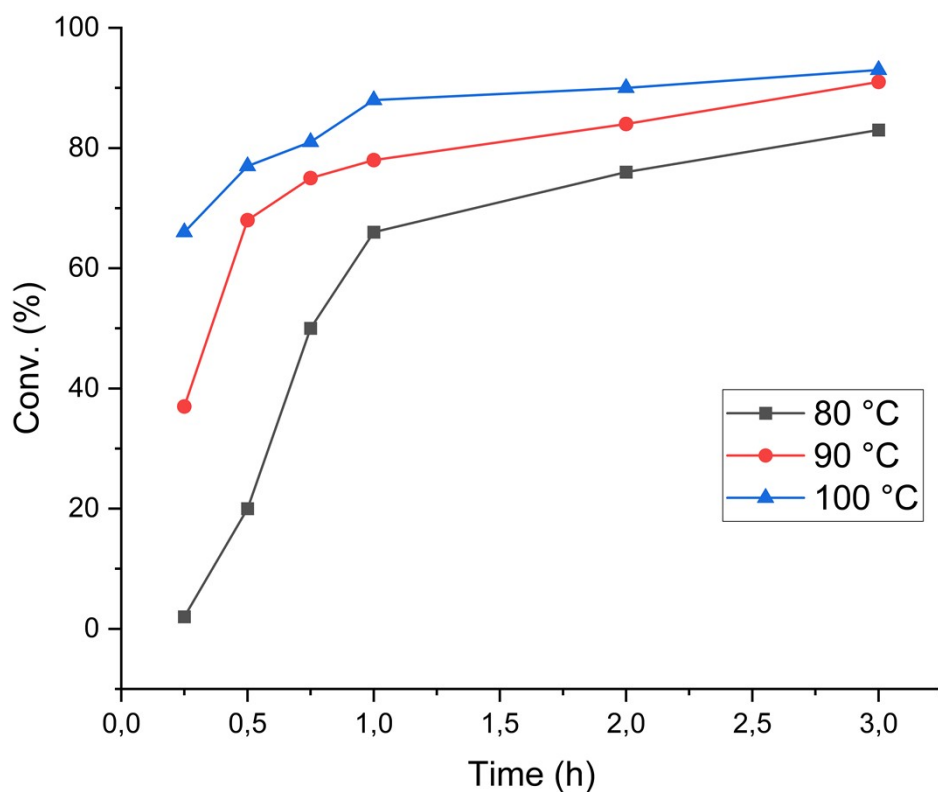

**Figure S15.** FA conversion vs time in EMIM OAc using 0.1 mol% **Ru-1** and 0.5 mL FA at different temperatures (80 °C, 90 °C, 100 °C).

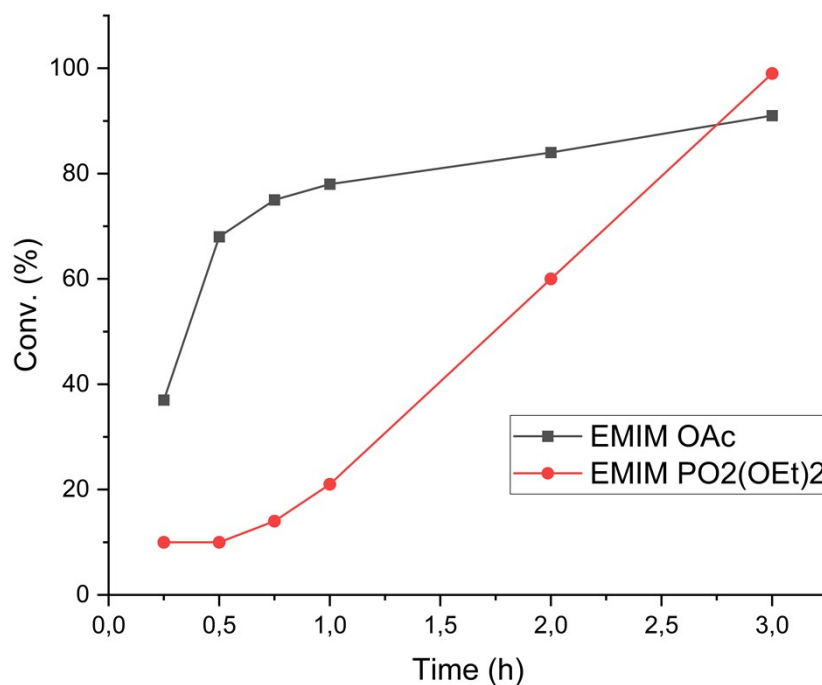

**Figure S16.** FA conversion vs time comparing EMIM OAc vs EMIM PO<sub>2</sub>(OEt)<sub>2</sub> using 0.1 mol% **Ru-1** and 0.5 mL FA, at 90 °C.

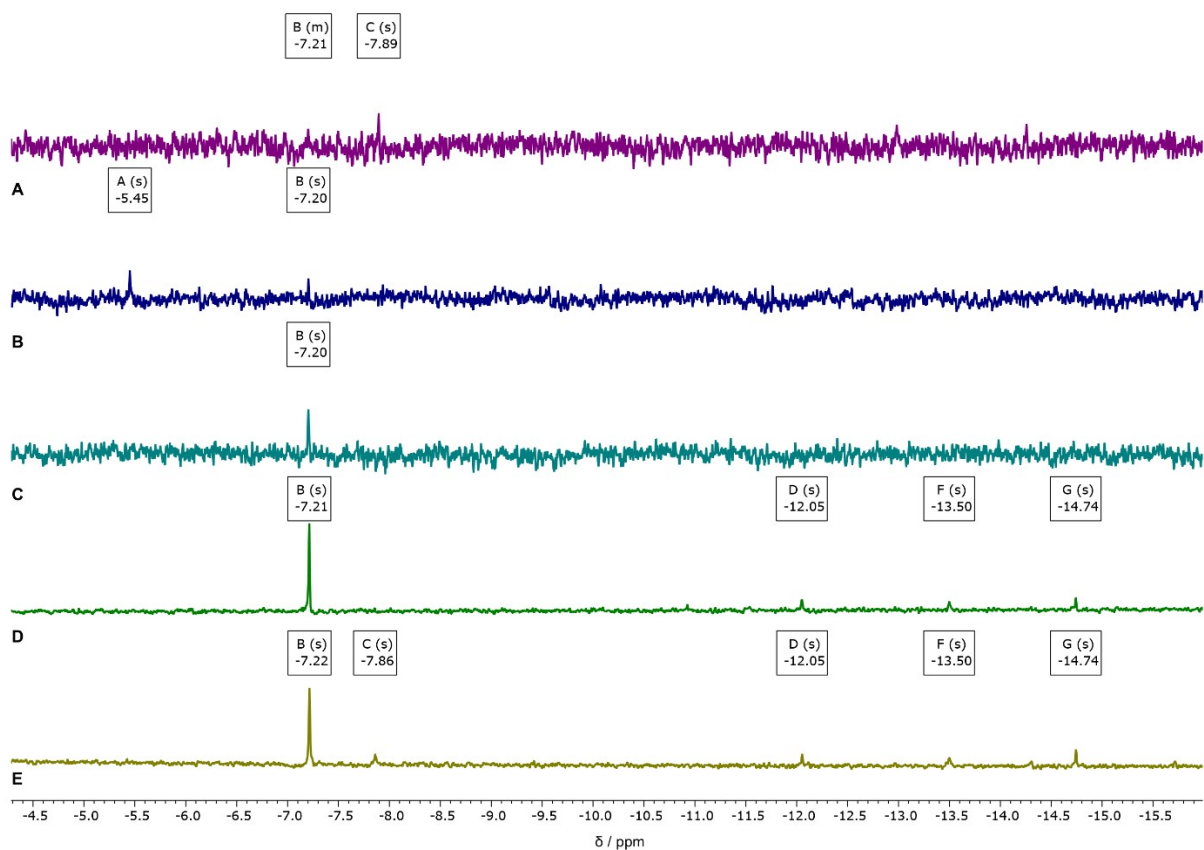

**Figure S17.** Stacked *in situ*  $^1\text{H}$  NMR spectra during and post FADH, showing the hydride region. Reaction conditions for **A**: EMIM  $\text{PO}_2(\text{OEt})_2$  (1 mL), **Ru-1** (0.1 mol%), FA (0.5 mL), 90  $^\circ\text{C}$ , cycle 2, 3 h; **B**: EMIM  $\text{PO}_2(\text{OEt})_2$  (1 mL), **Ru-1** (0.1 mol%), FA (0.5 mL), 90  $^\circ\text{C}$ , cycle 5, 3 h; **C**: EMIM  $\text{PO}_2(\text{OEt})_2$  (1 mL), **Ru-1** (0.1 mol%), FA (0.5 mL), 100  $^\circ\text{C}$ , 3 h; **D**: EMIM OAc (1 mL), **Ru-1** (0.05 mol%), FA (0.5 mL), 90  $^\circ\text{C}$ , 3 h; **E**: EMIM OAc (1 mL), **Ru-1** (0.1 mol%), FA (0.5 mL), 100  $^\circ\text{C}$ , 1 h.

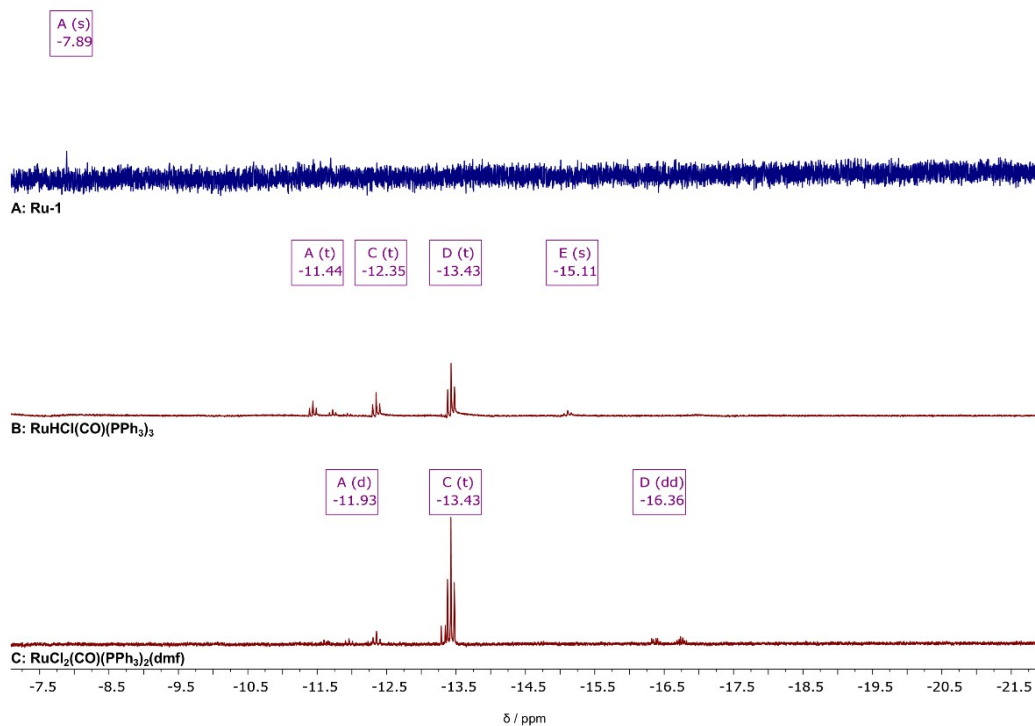

**Figure S18a.** Stacked *in situ*  $^1\text{H}$  NMR spectra after 45 minutes of the first cycle of the FADH, showing the hydride region. Reaction conditions for **A**: EMIM PO<sub>2</sub>(OEt)<sub>2</sub> (1 mL), **Ru-1** (0.1 mol%), FA (0.5 mL), 90 °C, cycle 1, 45 minutes; **B**: EMIM PO<sub>2</sub>(OEt)<sub>2</sub> (1 mL), **RuHCl(CO)(PPh<sub>3</sub>)<sub>3</sub>** (0.1 mol%), FA (0.5 mL), 90 °C, cycle 1, 45 minutes; **C**: EMIM PO<sub>2</sub>(OEt)<sub>2</sub> (1 mL), **RuCl<sub>2</sub>(CO)(PPh<sub>3</sub>)<sub>2</sub>(dmf)** (0.1 mol%), FA (0.5 mL), 90 °C, cycle 1, 45 minutes.

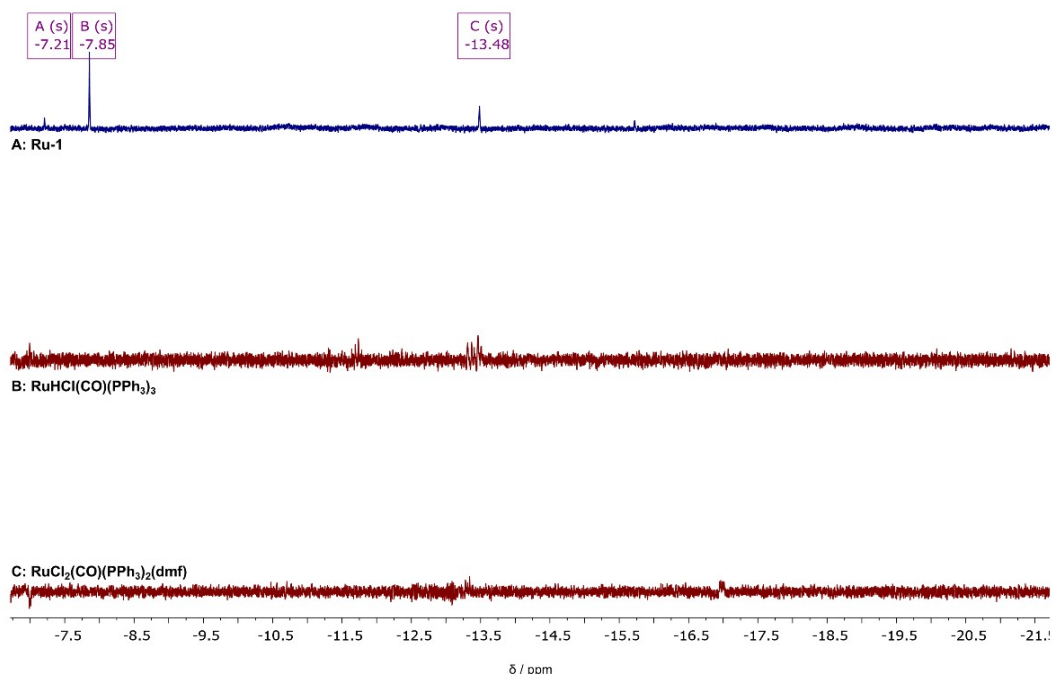

**Figure S18b.** Stacked *in situ*  $^1\text{H}$  NMR spectra after 45 minutes of the second cycle of the FADH, showing the hydride region. Reaction conditions for **A**: EMIM PO<sub>2</sub>(OEt)<sub>2</sub> (1 mL), **Ru-1** (0.1 mol%), FA (0.5 mL), 90 °C, cycle 1, 45 minutes; **B**: EMIM PO<sub>2</sub>(OEt)<sub>2</sub> (1 mL), **RuHCl(CO)(PPh<sub>3</sub>)<sub>3</sub>** (0.1 mol%), FA (0.5 mL), 90 °C, cycle 1, 45 minutes; **C**: EMIM PO<sub>2</sub>(OEt)<sub>2</sub> (1 mL), **RuCl<sub>2</sub>(CO)(PPh<sub>3</sub>)<sub>2</sub>(dmf)** (0.1 mol%), FA (0.5 mL), 90 °C, cycle 1, 45 minutes.

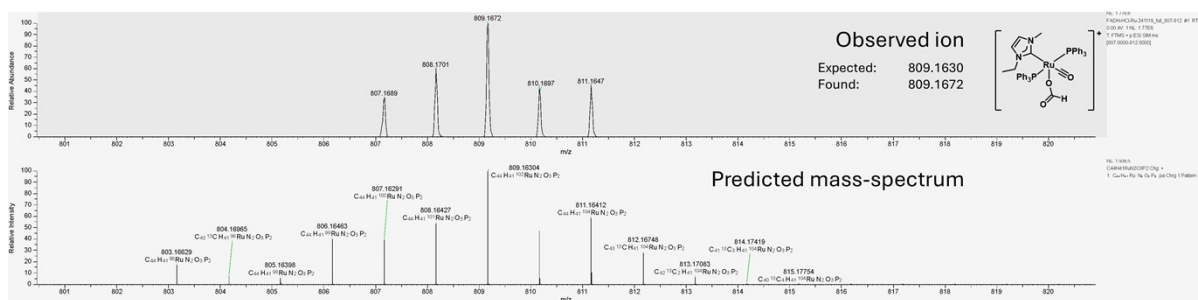

**Figure S19a.** *In situ* HR-MS spectrum of reaction mixture after 45 minutes during the first cycle using  $\text{RuHCl}(\text{CO})(\text{PPh}_3)_3$  as (pre) catalyst, showing the region responsible for a suggested formate-fragment.

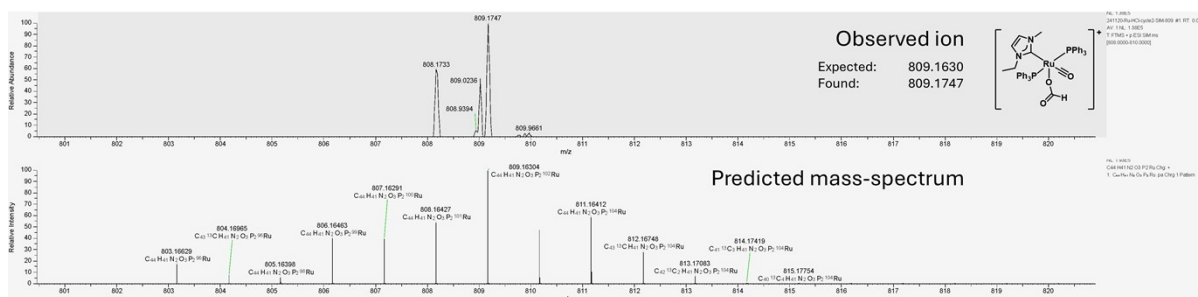

**Figure S19b.** *In situ* HR-MS spectrum of reaction mixture after 2 cycles and 3 hours using  $\text{RuHCl}(\text{CO})(\text{PPh}_3)_3$  as (pre) catalyst, showing the region responsible for a suggested formate-fragment.

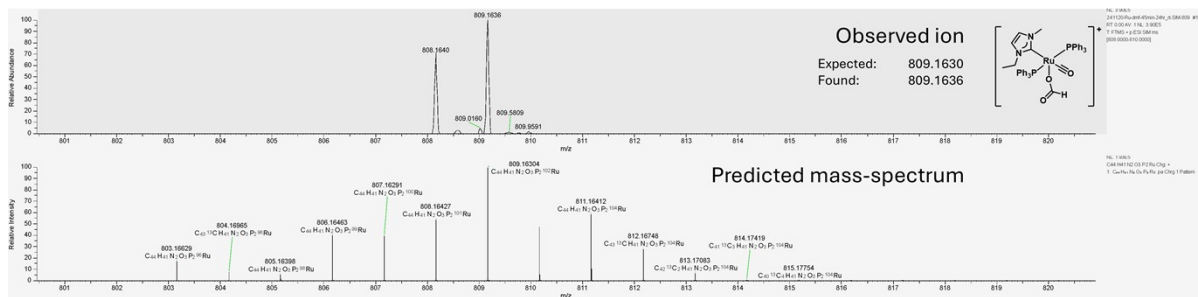

**Figure S19c.** *In situ* HR-MS spectrum of reaction mixture after 45 minutes during the first cycle using  $\text{RuCl}_2(\text{CO})(\text{PPh}_3)_2(\text{dmf})$  as (pre) catalyst, showing the region responsible for a suggested formate-fragment.

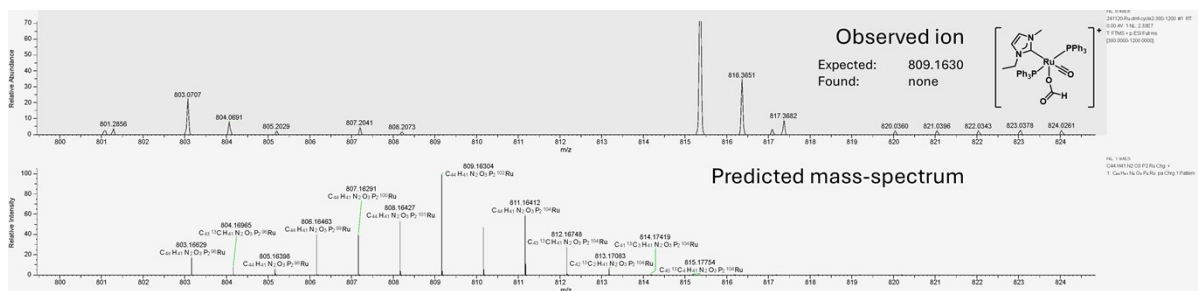

**Figure S19d.** *In situ* HR-MS spectrum of reaction mixture after 2 cycles and 3 hours using  $\text{RuCl}_2(\text{CO})(\text{PPh}_3)_2(\text{dmf})$  as (pre) catalyst, showing the region responsible for a suggested formate-fragment.



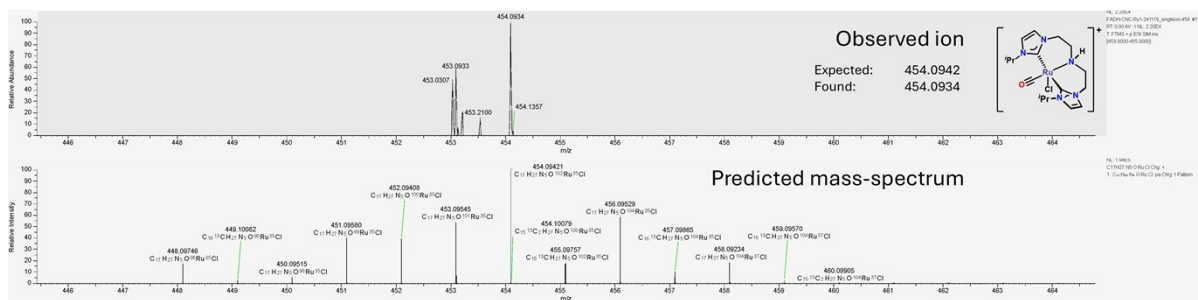

**Figure S19e.** *In situ* HR-MS spectrum of reaction mixture after 45 minutes during the first cycle using **Ru-1** as (pre) catalyst, showing the region responsible for a suggested chlorido-fragment.

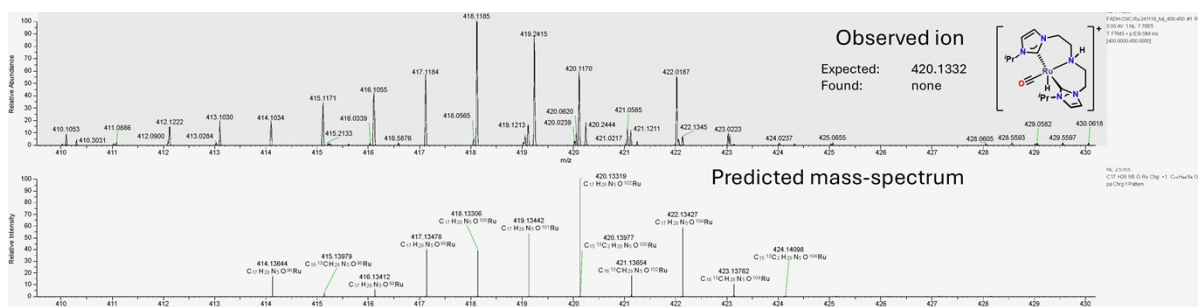

**Figure S19f.** *In situ* HR-MS spectrum of reaction mixture after 45 minutes during the first cycle using **Ru-1** as (pre) catalyst, showing the region responsible for a suggested hydrido-fragment.

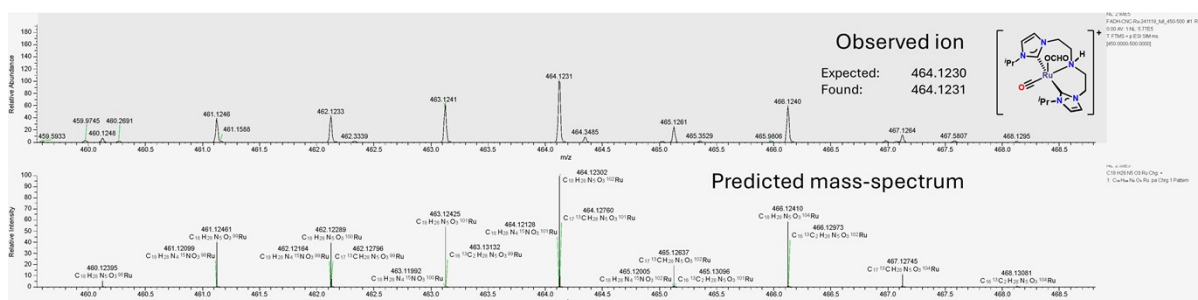

**Figure S19g.** *In situ* HR-MS spectrum of reaction mixture after 45 minutes during the first cycle using **Ru-1** as (pre) catalyst, showing the region responsible for a suggested formato-fragment.

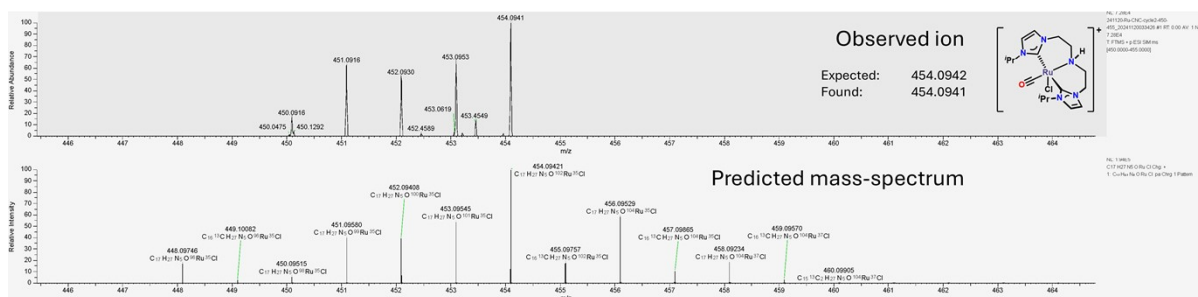

**Figure S19h.** *In situ* HR-MS spectrum of reaction mixture after 2 cycles and 3 hours using **Ru-1** as (pre) catalyst, showing the region responsible for a suggested chlorido-fragment.

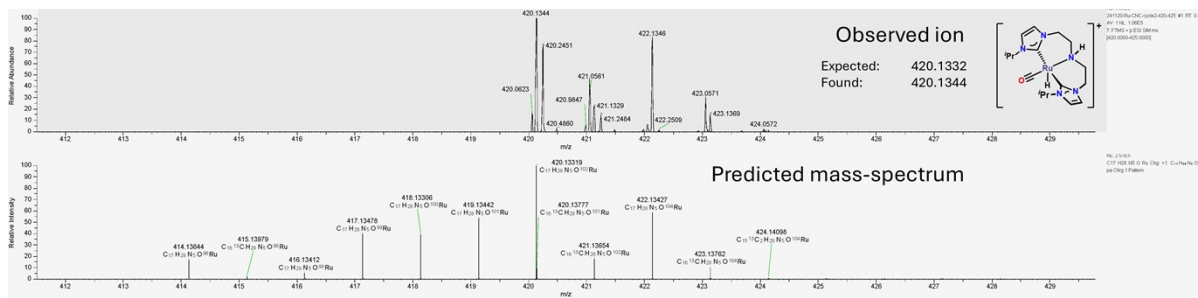

**Figure S19i.** *In situ* HR-MS spectrum of reaction mixture after 2 cycles and 3 hours using Ru-1 as (pre) catalyst, showing the region responsible for a suggested hydrido-fragment.

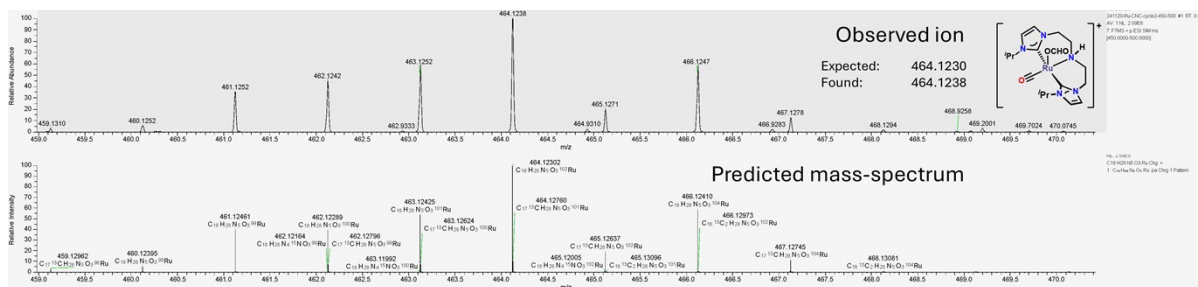

**Figure S19j.** *In situ* HR-MS spectrum of reaction mixture after 2 cycles and 3 hours using Ru-1 as (pre) catalyst, showing the region responsible for a suggested formate-fragment.

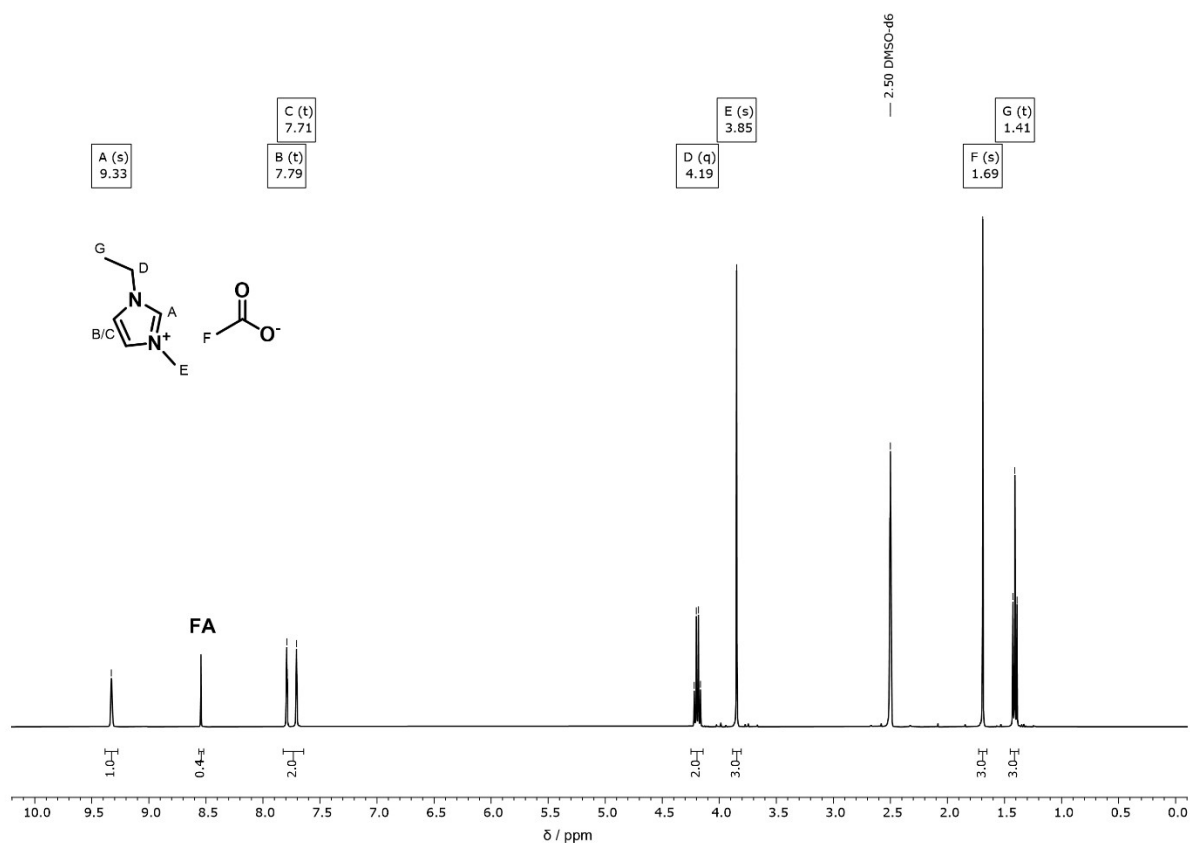

**Figure S20.** Example of  $^1\text{H}$  NMR of FADH in EMIM OAc (1 mL IL, 0.5 mL FA, 0.05 mol% Ru-1, 100 °C, 1 h, 80% conversion).

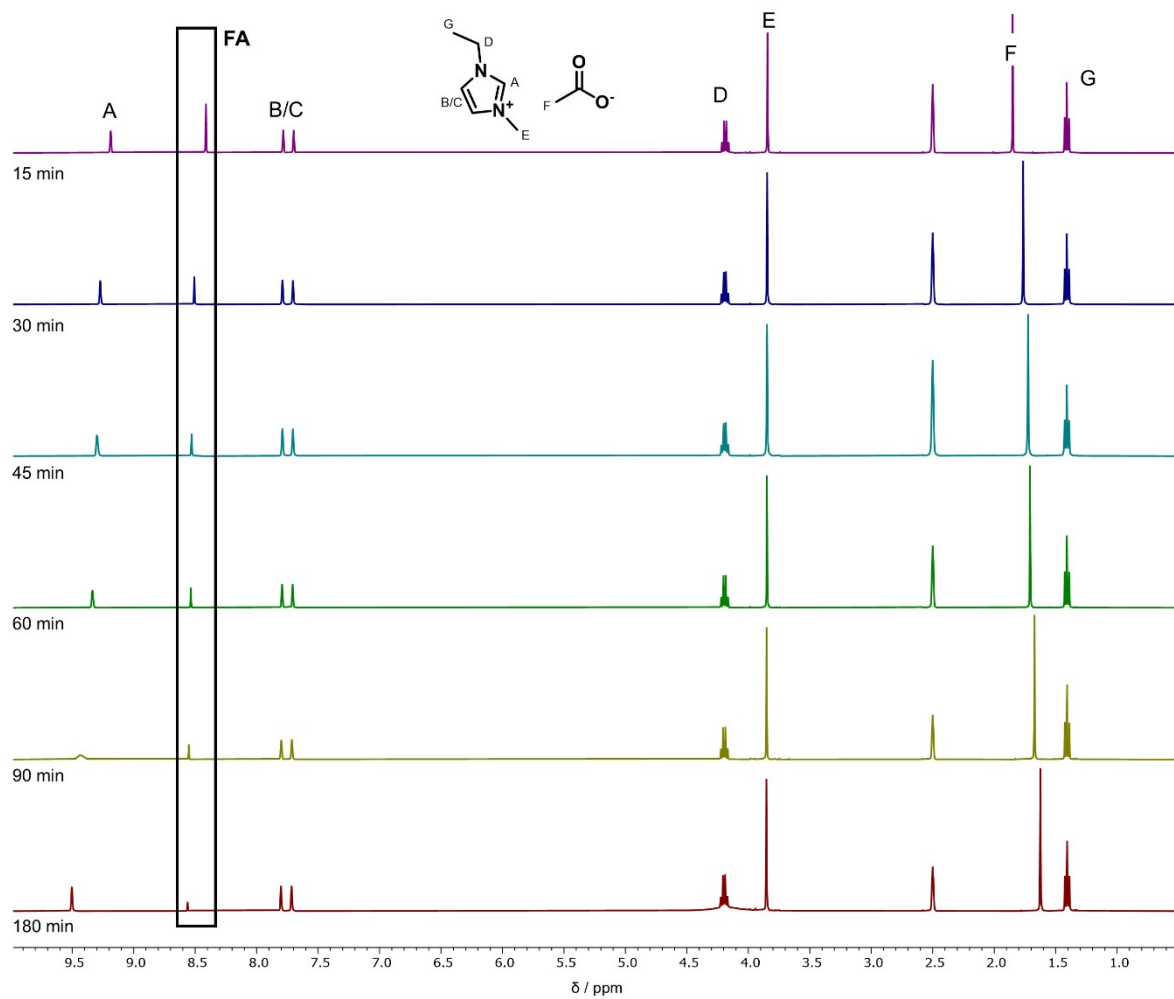

**Figure S21.** Example of stacked  $^1\text{H}$  NMR spectra of FADH in EMIM OAc over 3 h (1 mL IL, 0.5 mL FA, 0.1 mol% Ru-1, 90 °C).

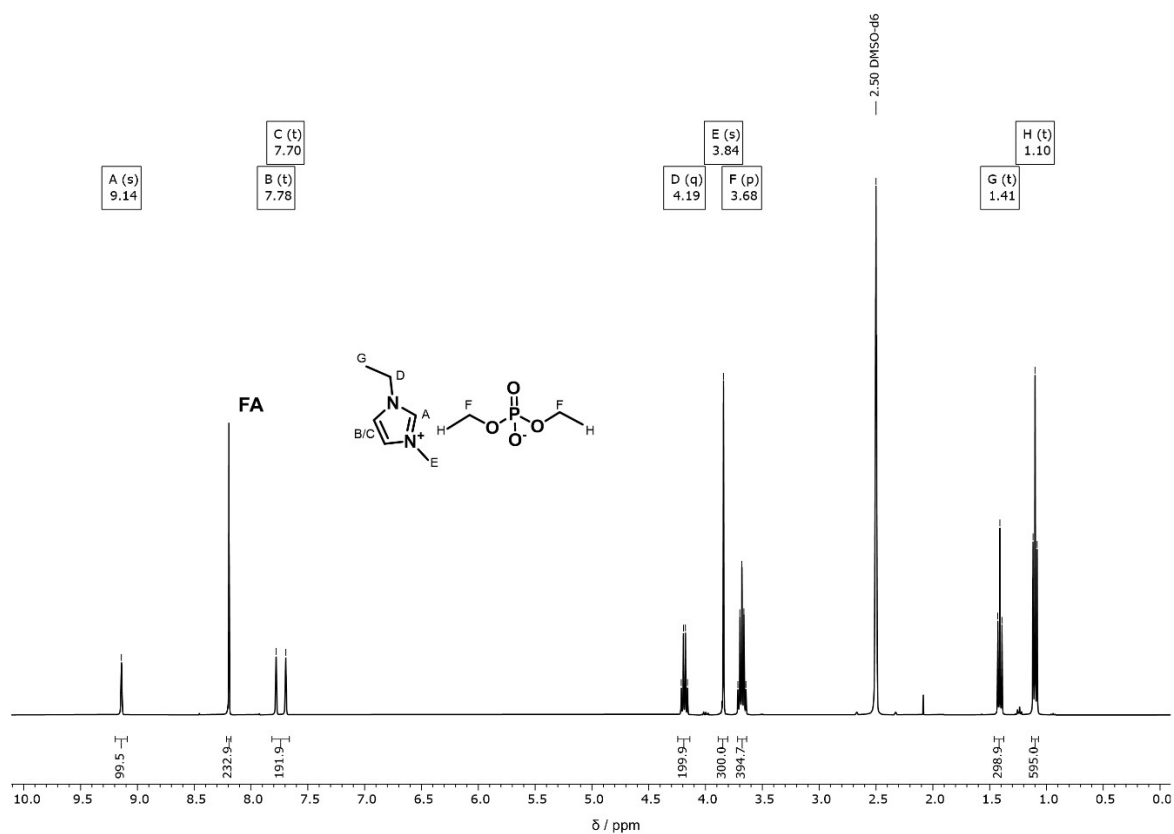

**Figure S22a.** Example of  $^1\text{H}$  NMR of FADH in  $\text{EMIM PO}_2(\text{OEt})_2$  (1 mL IL, 0.5 mL FA, 0.1 mol% **Ru-1**, 100 °C, 15 min, 20% conversion) (Integral: 1H = 100).

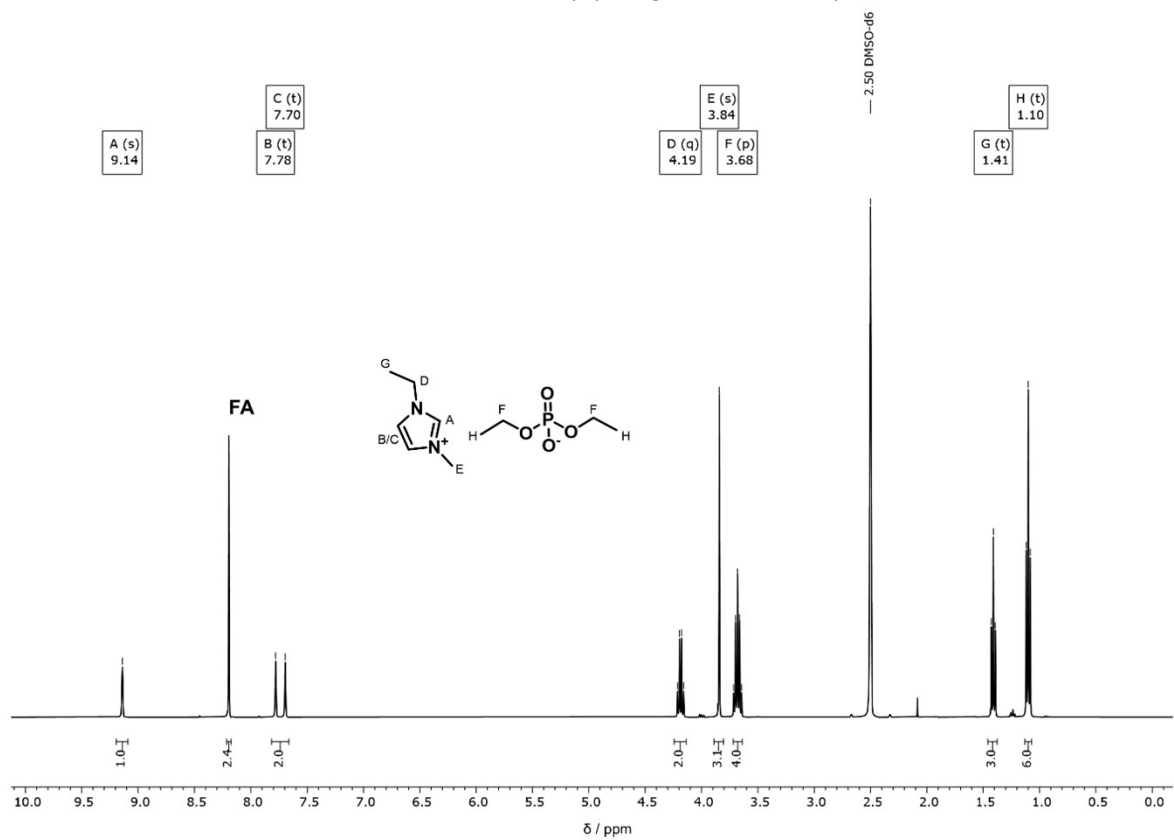

**Figure S22b.** Example of  $^1\text{H}$  NMR of FADH in  $\text{EMIM PO}_2(\text{OEt})_2$  (1 mL IL, 0.5 mL FA, 0.1 mol% **Ru-1**, 100 °C, 15 min, 20% conversion) (Integral: 1 H = 1)

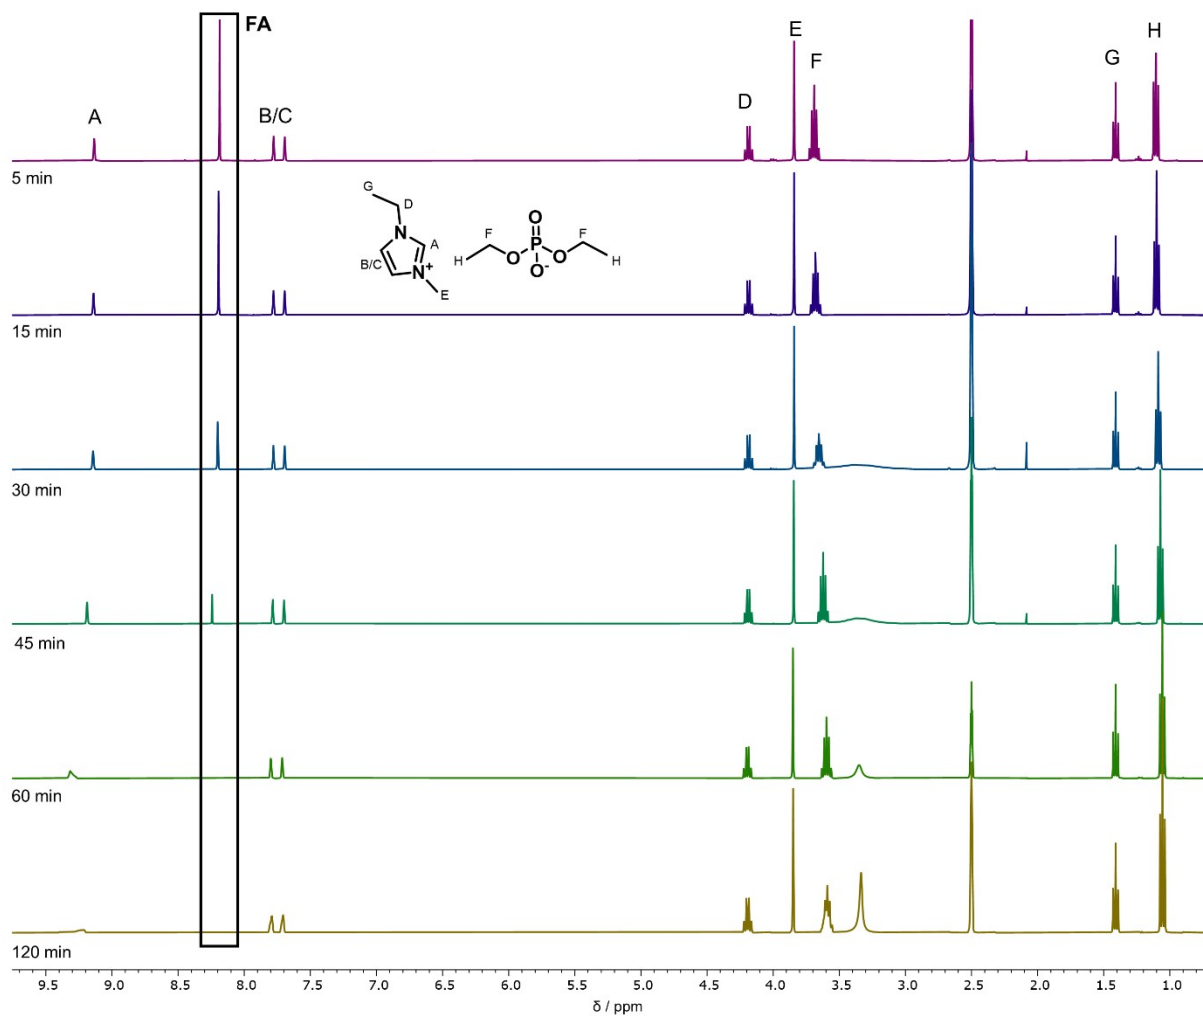

**Figure S23.** Example of stacked <sup>1</sup>H NMR spectra of FADH in EMIM PO<sub>2</sub>(OEt)<sub>2</sub> over 2 h (1 mL IL, 0.5 mL FA, 0.1 mol% Ru-1, 100 °C).

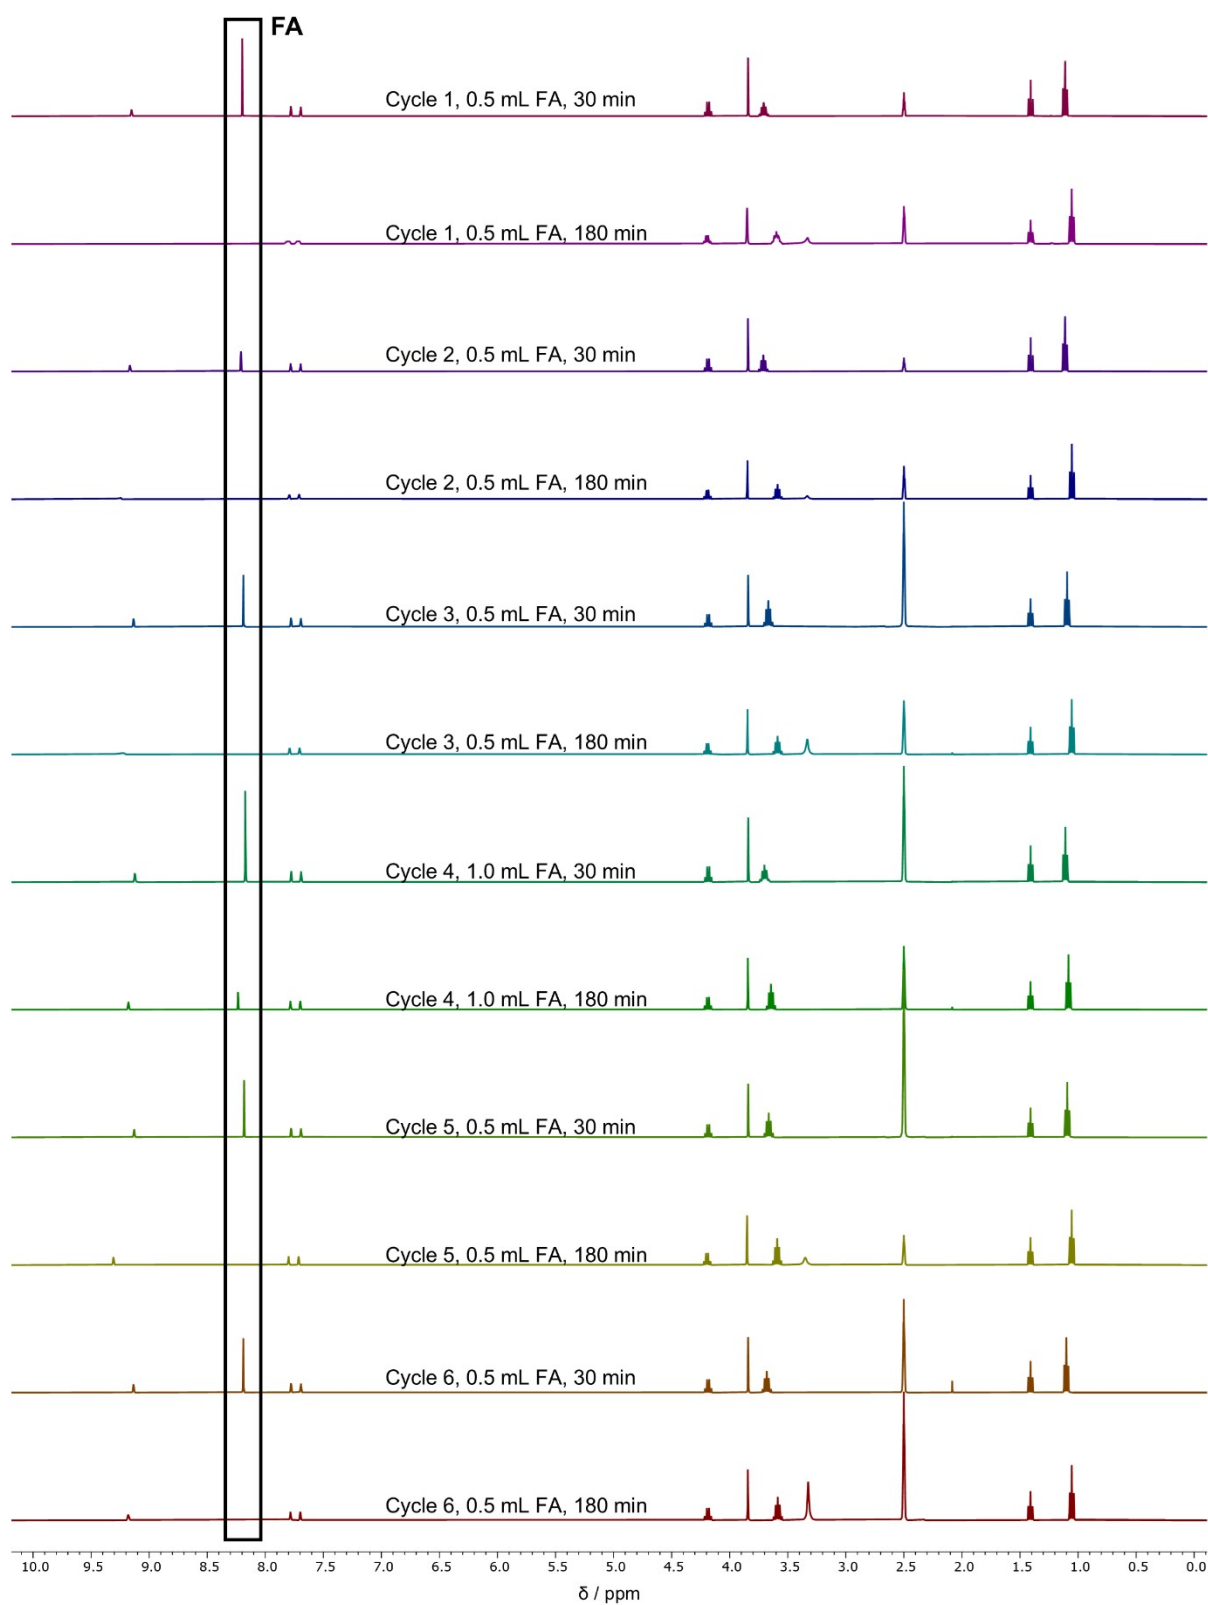

**Figure S24.** Stacked <sup>1</sup>H NMR spectra of FADH cycles in EMIM PO<sub>2</sub>(OEt)<sub>2</sub> at 90°C and with 0.1 mol% Ru-1 and 0.5- or 0.1-mL FA recorded after 30 and 180 min.

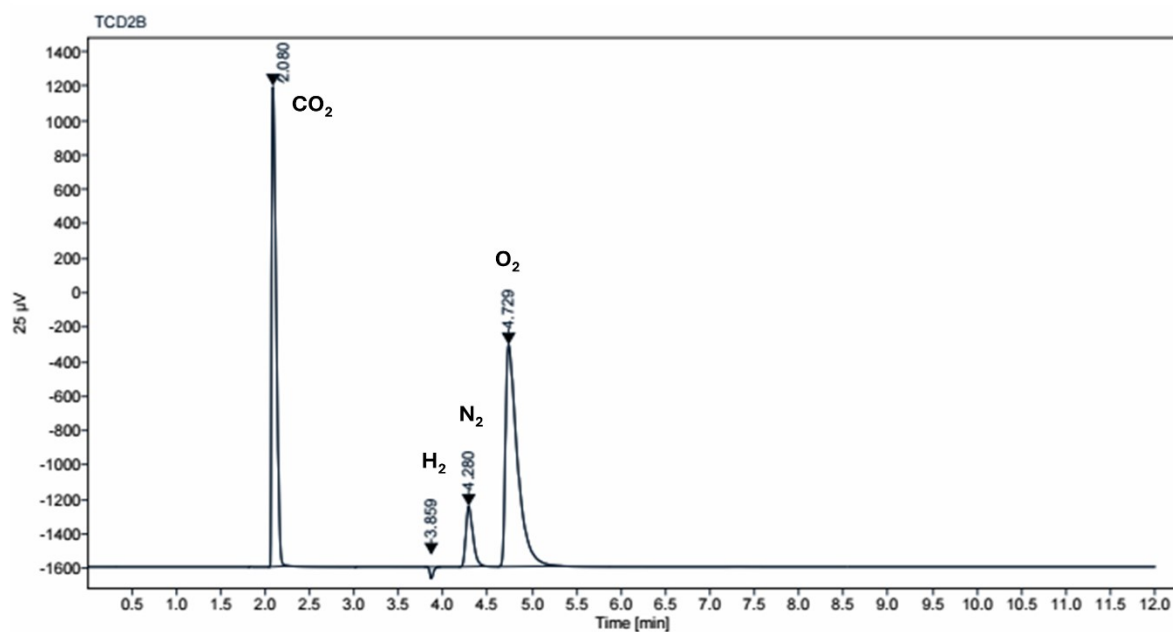

**Figure S25a.** GC-TCD report of FA dehydrogenation after 1 h at 90 °C in EMM  $\text{PO}_2(\text{OEt})_2$  with 0.1 mol%  $\text{RuCl}_2(\text{PPh}_3)_2(\text{dmf})$  and using 0.5 mL FA.

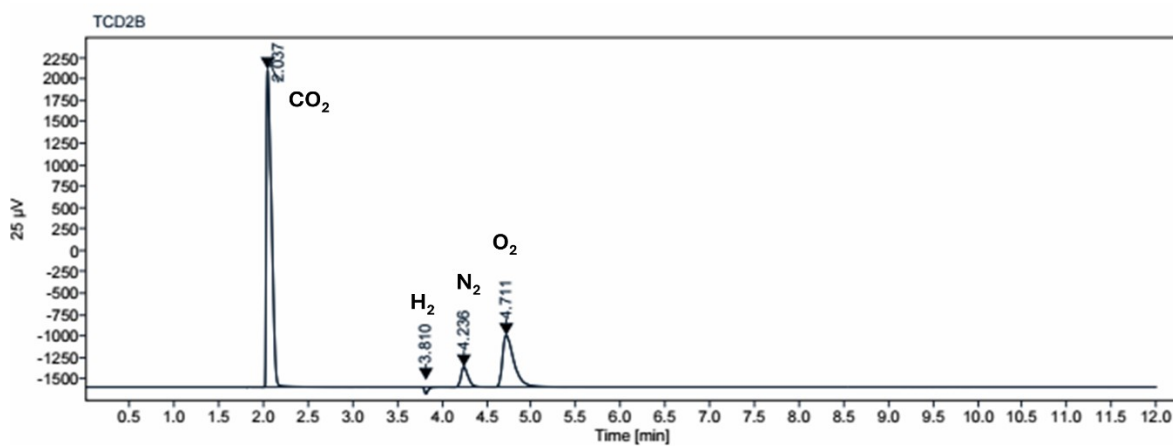

**Figure S25b.** GC-TCD report of FA dehydrogenation after 1 h at 90 °C in EMM  $\text{PO}_2(\text{OEt})_2$  with 0.1 mol%  $\text{RuHCl}(\text{CO})(\text{PPh}_3)_3$  and using 0.5 mL FA



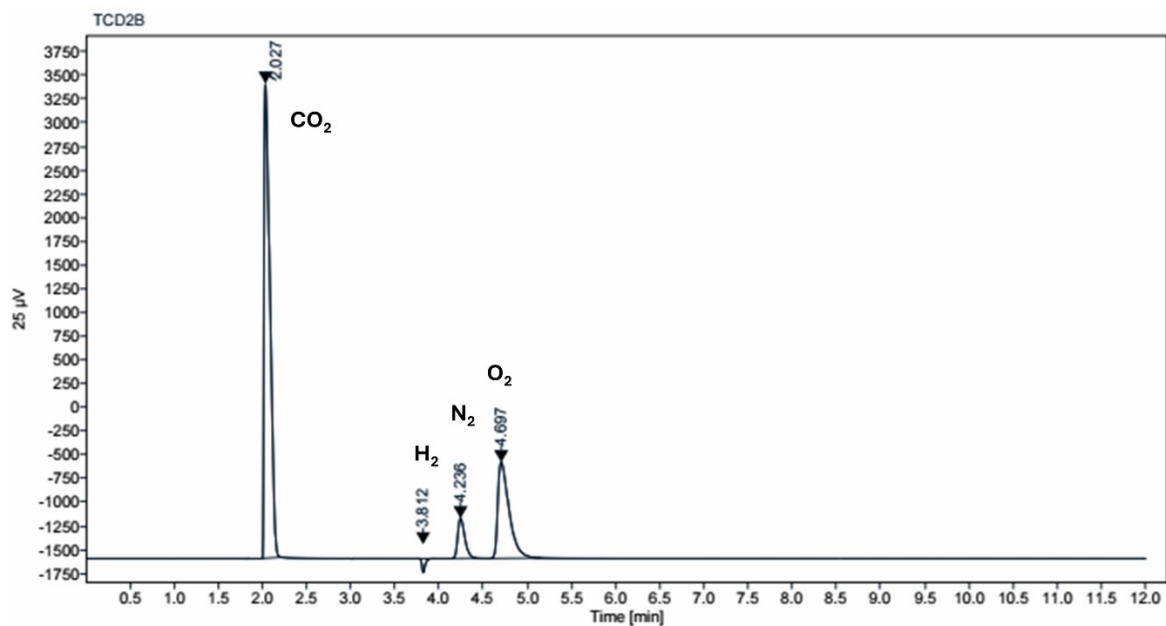

**Figure S25c.** GC-TCD report of FA dehydrogenation after 1 h at 90 °C in EMM PO<sub>2</sub>(OEt)<sub>2</sub> with 0.1 mol% Ru-1 and using 0.5 mL FA.

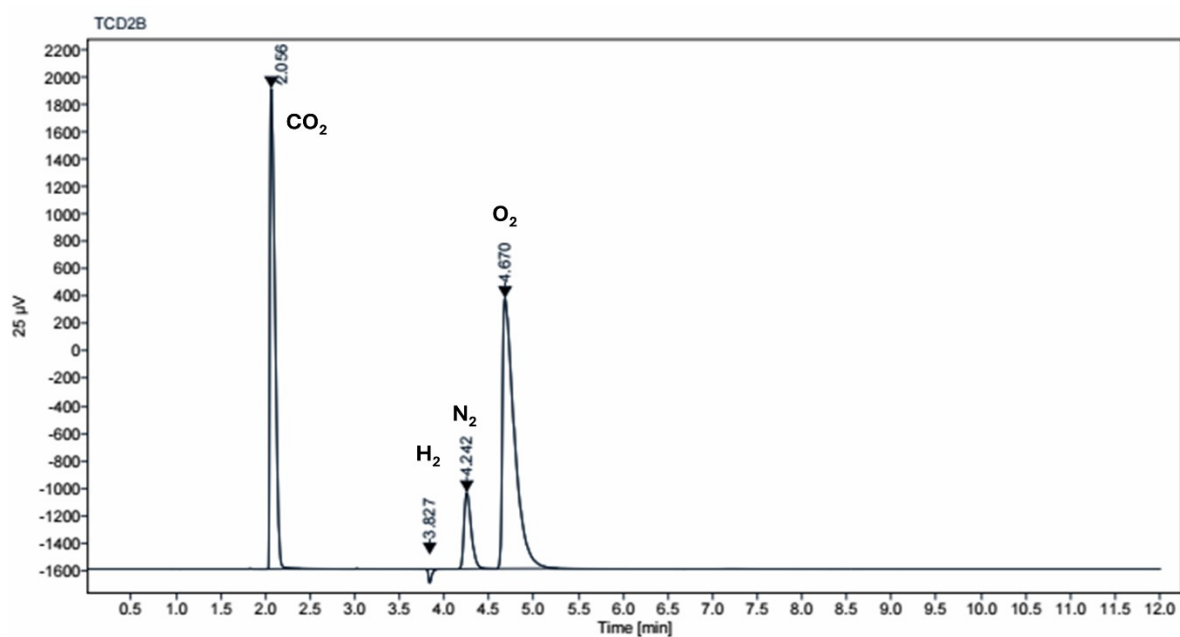

**Figure S25d.** GC-TCD report of FA dehydrogenation after 1 h at 100 °C in EMM PO<sub>2</sub>(OEt)<sub>2</sub> with 0.1 mol% Ru-1 and using 0.5 mL FA

**Table S6.** FA Dehydrogenation over time in EMIM OAc at 80 °C with **Ru-1** (0.1 mol%).<sup>a</sup>

| Entry | Time   | Conv. [%] <sup>b</sup> | TON | TOF (h <sup>-1</sup> ) |
|-------|--------|------------------------|-----|------------------------|
| 1     | 15 min | 2                      | 20  | 80                     |
| 2     | 30 min | 20                     | 200 | 400                    |
| 3     | 45 min | 50                     | 500 | 670                    |
| 4     | 1 h    | 66                     | 660 | 660                    |
| 5     | 2 h    | 76                     | 760 | 380                    |
| 6     | 3 h    | 83                     | 830 | 280                    |

<sup>a</sup>Reaction conditions: **Ru-1** (0.1 mol%), EMIM OAc (1 mL), FA (13.3 mmol, 0.5 mL), 80 °C.

<sup>b</sup>Determined by <sup>1</sup>H-NMR.

**Table S7.** FA Dehydrogenation over time in EMIM OAc at 90 °C with **Ru-1** (0.1 mol%).<sup>a</sup>

| Entry | Time   | Conv. [%] <sup>b</sup> | TON | TOF (h <sup>-1</sup> ) |
|-------|--------|------------------------|-----|------------------------|
| 1     | 15 min | 37                     | 370 | 1480                   |
| 2     | 30 min | 68                     | 680 | 1360                   |
| 3     | 45 min | 75                     | 750 | 1000                   |
| 4     | 1 h    | 78                     | 780 | 780                    |
| 5     | 2 h    | 84                     | 840 | 420                    |
| 6     | 3 h    | 91                     | 910 | 300                    |

<sup>a</sup>Reaction conditions: **Ru-1** (0.1 mol%), EMIM OAc (1 mL), FA (13.3 mmol, 0.5 mL), 90 °C.

<sup>b</sup>Determined by <sup>1</sup>H-NMR.

**Table S8.** FA Dehydrogenation over time in EMIM OAc at 100 °C with **Ru-1** (0.1 mol%).<sup>a</sup>

| Entry | Time   | Conv. [%] <sup>b</sup> | TON | TOF (h <sup>-1</sup> ) |
|-------|--------|------------------------|-----|------------------------|
| 1     | 15 min | 66                     | 660 | 2650                   |
| 2     | 30 min | 77                     | 770 | 1550                   |
| 3     | 45 min | 81                     | 810 | 1080                   |
| 4     | 1 h    | 88                     | 880 | 880                    |
| 5     | 2 h    | 90                     | 900 | 450                    |
| 6     | 3 h    | 93                     | 930 | 310                    |

<sup>a</sup>Reaction conditions: **Ru-1** (0.1 mol%), EMIM OAc (1 mL), FA (13.3 mmol, 0.5 mL), 100 °C.

<sup>b</sup>Determined by <sup>1</sup>H-NMR.

**Table S9.** FA Dehydrogenation over time in EMIM OAc at 90 °C with **Ru-1** (0.05 mol%).<sup>a</sup>

| Entry | Time   | Conv. [%] <sup>b</sup> | TON  | TOF (h <sup>-1</sup> ) |
|-------|--------|------------------------|------|------------------------|
| 1     | 15 min | 18                     | 360  | 1440                   |
| 2     | 30 min | 40                     | 800  | 1610                   |
| 3     | 45 min | 61                     | 1220 | 1630                   |
| 4     | 1 h    | 70                     | 1400 | 1400                   |
| 5     | 2 h    | 81                     | 1630 | 810                    |
| 6     | 3 h    | 86                     | 1730 | 570                    |

<sup>a</sup>Reaction conditions: **Ru-1** (0.05 mol%), EMIM OAc (1 mL), FA (13.3 mmol, 0.5 mL), 90 °C.

<sup>b</sup>Determined by <sup>1</sup>H-NMR.

**Table S10.** FA Dehydrogenation over time in EMIM OAc at 90 °C with **Ru-1** (0.025 mol%).<sup>a</sup>

| Entry | Time   | Conv. [%] <sup>b</sup> | TON  | TOF (h <sup>-1</sup> ) |
|-------|--------|------------------------|------|------------------------|
| 1     | 15 min | 8                      | 320  | 1290                   |
| 2     | 30 min | 20                     | 810  | 1610                   |
| 3     | 45 min | 34                     | 1370 | 1830                   |
| 4     | 1 h    | 50                     | 2010 | 2010                   |
| 5     | 2 h    | 64                     | 2580 | 1290                   |
| 6     | 3 h    | 73                     | 2940 | 980                    |

<sup>a</sup>Reaction conditions: **Ru-1** (0.025 mol%), EMIM OAc (1 mL), FA (13.3 mmol, 0.5 mL), 90 °C.

<sup>b</sup>Determined by <sup>1</sup>H-NMR.

**Table S11.** FA Dehydrogenation over time in EMIM OAc at 100 °C with **Ru-1** (0.05 mol%).<sup>a</sup>

| Entry | Time   | Conv. [%] <sup>b</sup> | TON  | TOF (h <sup>-1</sup> ) |
|-------|--------|------------------------|------|------------------------|
| 1     | 15 min | 44                     | 880  | 3530                   |
| 2     | 30 min | 71                     | 1420 | 2850                   |
| 3     | 45 min | 77                     | 1550 | 2060                   |
| 4     | 1 h    | 80                     | 1610 | 1610                   |
| 5     | 2 h    | 87                     | 1750 | 880                    |
| 6     | 3 h    | 90                     | 1810 | 600                    |

<sup>a</sup>Reaction conditions: **Ru-1** (0.05 mol%), EMIM OAc (1 mL), FA (13.3 mmol, 0.5 mL), 100 °C.

<sup>b</sup>Determined by <sup>1</sup>H-NMR.

**Table S12.** FA Dehydrogenation over time in EMIM PO<sub>2</sub>(OEt)<sub>2</sub> at 90 °C with **Ru-1** (0.1 mol%).<sup>a</sup>

| Entry | Time   | Conv. [%] <sup>b</sup> | TON  | TOF (h <sup>-1</sup> ) |
|-------|--------|------------------------|------|------------------------|
| 1     | 15 min | 10                     | 100  | 400                    |
| 2     | 30 min | 10                     | 100  | 200                    |
| 3     | 45 min | 14                     | 140  | 190                    |
| 4     | 1 h    | 21                     | 210  | 210                    |
| 5     | 2 h    | 60                     | 600  | 300                    |
| 6     | 3 h    | >99                    | 1000 | 330                    |

<sup>a</sup>Reaction conditions: **Ru-1** (0.1 mol%), EMIM PO<sub>2</sub>(OEt)<sub>2</sub> (1 mL), FA (13.3 mmol, 0.5 mL), 90 °C. <sup>b</sup>Determined by <sup>1</sup>H-NMR.

**Table S13.** FA Dehydrogenation over time in EMIM PO<sub>2</sub>(OEt)<sub>2</sub> at 100 °C with **Ru-1** (0.1 mol%).<sup>a</sup>

| Entry | Time   | Conv. [%] <sup>b</sup> | TON  | TOF (h <sup>-1</sup> ) |
|-------|--------|------------------------|------|------------------------|
| 1     | 15 min | 21                     | 210  | 840                    |
| 2     | 30 min | 46                     | 460  | 920                    |
| 3     | 45 min | 82                     | 820  | 1100                   |
| 4     | 1 h    | 99                     | 990  | 990                    |
| 5     | 2 h    | 99                     | 990  | 500                    |
| 6     | 3 h    | >99                    | 1000 | 330                    |

<sup>a</sup>Reaction conditions: **Ru-1** (0.1 mol%), EMIM PO<sub>2</sub>(OEt)<sub>2</sub> (1 mL), FA (13.3 mmol, 0.5 mL), 100 °C. <sup>b</sup>Determined by <sup>1</sup>H-NMR.

**Table S14.** FA Dehydrogenation over time in EMIM PO<sub>2</sub>(OEt)<sub>2</sub> at 100 °C with **Ru-1** (0.05 mol%).<sup>a</sup>

| Entry | Time   | Conv. [%] <sup>b</sup> | TON  | TOF (h <sup>-1</sup> ) |
|-------|--------|------------------------|------|------------------------|
| 1     | 15 min | 3                      | 60   | 240                    |
| 2     | 30 min | 9                      | 180  | 360                    |
| 3     | 45 min | 21                     | 420  | 560                    |
| 4     | 1 h    | 27                     | 540  | 540                    |
| 5     | 2 h    | 82                     | 1650 | 830                    |
| 6     | 3 h    | 99                     | 2000 | 660                    |

<sup>a</sup>Reaction conditions: **Ru-1** (0.05 mol%), EMIM PO<sub>2</sub>(OEt)<sub>2</sub> (1 mL), FA (13.3 mmol, 0.5 mL), 100 °C. <sup>b</sup>Determined by <sup>1</sup>H-NMR.

**Table S15.** Second cycle for the FADH using the optimized catalytic system of **Ru-1** in EMIM PO<sub>2</sub>(OEt)<sub>2</sub> at 90 °C.<sup>a</sup>

| Entry | Time   | Conv. [%] <sup>b</sup> | TON  | TOF (h <sup>-1</sup> ) |
|-------|--------|------------------------|------|------------------------|
| 1     | 15 min | 12                     | 120  | 470                    |
| 2     | 30 min | 25                     | 250  | 500                    |
| 3     | 45 min | 42                     | 420  | 560                    |
| 4     | 1 h    | 65                     | 650  | 650                    |
| 5     | 2 h    | >99                    | 1000 | 500                    |
| 6     | 3 h    | >99                    | 1000 | 330                    |

<sup>a</sup>Standard reaction conditions: **Ru-1** (0.1 mol% in first cycle), EMIM PO<sub>2</sub>(OEt)<sub>2</sub> (1 mL), FA (0.5 mL), 90 °C, 3 h under gentle flow of Ar. In each cycle, 0.5 mL FA is added. The solution is stirred overnight at 90 °C between finishing a cycle and commencing the next. <sup>b</sup>Determined by <sup>1</sup>H-NMR.

**Table S16.** Third cycle for the FADH using the optimized catalytic system of **Ru-1** in EMIM PO<sub>2</sub>(OEt)<sub>2</sub> at 90 °C.<sup>a</sup>

| Entry | Time   | Conv. [%] <sup>b</sup> | TON  | TOF (h <sup>-1</sup> ) |
|-------|--------|------------------------|------|------------------------|
| 1     | 15 min | 11                     | 110  | 440                    |
| 2     | 30 min | 19                     | 190  | 380                    |
| 3     | 45 min | 34                     | 340  | 450                    |
| 4     | 1 h    | 54                     | 540  | 540                    |
| 5     | 2 h    | >99                    | 990  | 500                    |
| 6     | 3 h    | >99                    | 1000 | 330                    |

<sup>a</sup>Standard reaction conditions: **Ru-1** (0.1 mol% in first cycle), EMIM PO<sub>2</sub>(OEt)<sub>2</sub> (1 mL), FA (0.5 mL), 90 °C, 3 h under gentle flow of Ar. In each cycle, 0.5 mL FA is added. The solution is stirred overnight at 90 °C between finishing a cycle and commencing the next.

<sup>b</sup>Determined by <sup>1</sup>H-NMR.

**Table S17.** Fourth cycle for the FADH using the optimized catalytic system of **Ru-1** in EMIM PO<sub>2</sub>(OEt)<sub>2</sub> at 90 °C.<sup>a</sup>

| Entry | Time   | Conv. [%] <sup>b</sup> | TON  | TOF (h <sup>-1</sup> ) |
|-------|--------|------------------------|------|------------------------|
| 1     | 15 min | 25                     | 500  | 2010                   |
| 2     | 30 min | 26                     | 520  | 1040                   |
| 3     | 45 min | nd <sup>c</sup>        | nd   | nd                     |
| 4     | 1 h    | 20                     | 400  | 400                    |
| 5     | 2 h    | 50                     | 1000 | 500                    |
| 6     | 3 h    | 85                     | 1710 | 570                    |

<sup>a</sup>Standard reaction conditions: **Ru-1** (0.1 mol% in first cycle), EMIM PO<sub>2</sub>(OEt)<sub>2</sub> (1 mL), FA (1.0 mL), 90 °C, 3 h under gentle flow of Ar. In the fourth cycle, 1.0 mL FA is added. The solution is stirred overnight at 90 °C between finishing a cycle and commencing the next.

<sup>b</sup>Determined by <sup>1</sup>H-NMR.

<sup>c</sup>Not determined

**Table S18.** Fifth cycle for the FADH using the optimized catalytic system of **Ru-1** in EMIM PO<sub>2</sub>(OEt)<sub>2</sub> at 90 °C.<sup>a</sup>

| Entry | Time   | Conv. [%] <sup>b</sup> | TON  | TOF (h <sup>-1</sup> ) |
|-------|--------|------------------------|------|------------------------|
| 1     | 15 min | 2                      | 20   | 80                     |
| 2     | 30 min | 9                      | 90   | 180                    |
| 3     | 45 min | 17                     | 170  | 380                    |
| 4     | 1 h    | 25                     | 250  | 250                    |
| 5     | 2 h    | 99                     | 1000 | 500                    |
| 6     | 3 h    | >99                    | 1000 | 330                    |

<sup>a</sup>Standard reaction conditions: **Ru-1** (0.1 mol% in first cycle), EMIM PO<sub>2</sub>(OEt)<sub>2</sub> (1 mL), FA (0.5 mL), 90 °C, 3 h under gentle flow of Ar. In each cycle, 0.5 mL FA is added. The solution is stirred overnight at 90 °C between finishing a cycle and commencing the next.

<sup>b</sup>Determined by <sup>1</sup>H-NMR.

**Table S19.** Sixth cycle for the FADH using the optimized catalytic system of **Ru-1** in EMIM PO<sub>2</sub>(OEt)<sub>2</sub> at 90 °C.<sup>a</sup>

| Entry | Time   | Conv. [%] <sup>b</sup> | TON  | TOF (h <sup>-1</sup> ) |
|-------|--------|------------------------|------|------------------------|
| 1     | 15 min | nd                     | nd   | nd                     |
| 2     | 30 min | 8                      | 80   | 160                    |
| 3     | 45 min | 11                     | 110  | 150                    |
| 4     | 1 h    | 23                     | 230  | 230                    |
| 5     | 2 h    | 98                     | 980  | 490                    |
| 6     | 3 h    | 100                    | 1000 | 330                    |

<sup>a</sup>Standard reaction conditions: **Ru-1** (0.1 mol% in first cycle), EMIM PO<sub>2</sub>(OEt)<sub>2</sub> (1 mL), FA (0.5 mL), 90 °C, 3 h under gentle flow of Ar. In each cycle, 0.5 mL FA is added. The solution is stirred overnight at 90 °C between finishing a cycle and commencing the next.

<sup>b</sup>Determined by <sup>1</sup>H-NMR.

**Table 19b.** FADH cycles using the optimised catalytic system of **Ru-1** in EMIM PO<sub>2</sub>(OEt)<sub>2</sub>.<sup>a</sup>

| Cycle          | FA [mL] | Conv. [%] <sup>b</sup> | TON               | Accumulated TON | TOF <sub>max</sub> [h <sup>-1</sup> ] |
|----------------|---------|------------------------|-------------------|-----------------|---------------------------------------|
| 1              | 0.5     | >99                    | 1000              | -               | 400                                   |
| 2              | 0.5     | >99                    | 1000              | 2000            | 650                                   |
| 3              | 0.5     | >99                    | 1000              | 3000            | 540                                   |
| 4 <sup>c</sup> | 1.0     | 85                     | 1706 <sup>d</sup> | 4710            | 2010                                  |
| 5              | 0.5     | >99                    | 1000              | 5710            | 500                                   |
| 6              | 0.5     | >99                    | 1000              | 6710            | 490                                   |

<sup>a</sup>Standard reaction conditions: **Ru-1** (0.1 mol% in first cycle), EMIM PO<sub>2</sub>(OEt)<sub>2</sub> (1 mL), FA (0.5 or 1.0 mL), 90 °C, 3 h under gentle flow of Ar. Gas composition is analysed by GC-TCD. In each cycle, 0.5 mL FA is added. The solution is stirred overnight at 90 °C between finishing a cycle and commencing the next. <sup>b</sup>Determined by <sup>1</sup>H-NMR. <sup>c</sup>1 mL FA added after leaving the solution of the catalyst in IL stirring overnight at 90 °C. <sup>d</sup>The remaining FA is fully dehydrogenated in the subsequent period before the next cycle.

**Table S20.** FA Dehydrogenation over time in EMIM PO<sub>2</sub>(OEt)<sub>2</sub> at 90 °C with **RuCl<sub>2</sub>(CO)(PPh<sub>3</sub>)<sub>2</sub>(dmf)** (0.1 mol%).<sup>a</sup>

| Entry | Time   | Conv. [%] <sup>b</sup> | TON  | TOF (h <sup>-1</sup> ) |
|-------|--------|------------------------|------|------------------------|
| 1     | 15 min | 24                     | 240  | 960                    |
| 2     | 30 min | 30                     | 300  | 600                    |
| 3     | 45 min | 44                     | 440  | 590                    |
| 4     | 1 h    | >99                    | 1000 | 1000                   |
| 5     | 2 h    | >99                    | 1000 | 500                    |
| 6     | 3 h    | >99                    | 1000 | 330                    |

<sup>a</sup>Reaction conditions: **RuCl<sub>2</sub>(CO)(PPh<sub>3</sub>)<sub>2</sub>(dmf)** (0.1 mol%), EMIM PO<sub>2</sub>(OEt)<sub>2</sub> (1 mL), FA (13.3 mmol, 0.5 mL), 90 °C. <sup>b</sup>Determined by <sup>1</sup>H-NMR.

**Table S21.** FA Dehydrogenation over time in EMIM PO<sub>2</sub>(OEt)<sub>2</sub> at 90 °C with RuCl<sub>2</sub>(CO)(PPh<sub>3</sub>)<sub>2</sub>(dmf) (0.1 mol%).<sup>a</sup>

| Entry | Time   | Conv. [%] <sup>b</sup> | TON  | TOF (h <sup>-1</sup> ) |
|-------|--------|------------------------|------|------------------------|
| 1     | 15 min | 18                     | 180  | 720                    |
| 2     | 30 min | 23                     | 230  | 460                    |
| 3     | 45 min | 31                     | 310  | 410                    |
| 4     | 1 h    | 33                     | 330  | 330                    |
| 5     | 2 h    | 99                     | 1000 | 500                    |
| 6     | 3 h    | 99                     | 1000 | 330                    |

<sup>a</sup>Reaction conditions: RuCl<sub>2</sub>(CO)(PPh<sub>3</sub>)<sub>2</sub>(dmf) (0.1 mol%), EMIM PO<sub>2</sub>(OEt)<sub>2</sub> (1 mL), adding 0.5 mL more of FA (13.3 mmol) after leaving the catalytic system stirring overnight at 90 °C

<sup>b</sup>Determined by <sup>1</sup>H-NMR.

**Table S22.** FA Dehydrogenation over time in EMIM PO<sub>2</sub>(OEt)<sub>2</sub> at 90 °C with RuCl<sub>2</sub>(CO)(PPh<sub>3</sub>)<sub>2</sub>(dmf) (0.1 mol%).<sup>a</sup>

| Entry | Time   | Conv. [%] <sup>b</sup> | TON  | TOF (h <sup>-1</sup> ) |
|-------|--------|------------------------|------|------------------------|
| 1     | 15 min | 32                     | 640  | 2570                   |
| 2     | 30 min | 34                     | 680  | 1370                   |
| 3     | 45 min | 40                     | 800  | 1070                   |
| 4     | 1 h    | 45                     | 900  | 900                    |
| 5     | 2 h    | 49                     | 980  | 490                    |
| 6     | 3 h    | 53                     | 1060 | 350                    |

<sup>a</sup>Reaction conditions: RuCl<sub>2</sub>(CO)(PPh<sub>3</sub>)<sub>2</sub>(dmf) (0.1 mol%), EMIM PO<sub>2</sub>(OEt)<sub>2</sub> (1 mL), adding 1 mL more of FA (26.6 mmol) after leaving the catalytic system stirring overnight at 90 °C.

<sup>b</sup>Determined by <sup>1</sup>H-NMR.

**Table S23. Cycle 1.** FA Dehydrogenation over time in EMIM PO<sub>2</sub>(OEt)<sub>2</sub> at 90 °C with RuHCl(CO)(PPh<sub>3</sub>)<sub>3</sub> (0.1 mol%).

| Entry | Time   | Conv. [%] <sup>b</sup> | TON  | TOF (h <sup>-1</sup> ) |
|-------|--------|------------------------|------|------------------------|
| 1     | 15 min | 17                     | 170  | 680                    |
| 2     | 30 min | 17                     | 170  | 340                    |
| 3     | 45 min | 27                     | 270  | 360                    |
| 4     | 1 h    | 35                     | 350  | 350                    |
| 5     | 2 h    | >99                    | 1000 | 500                    |
| 6     | 3 h    | >99                    | 1000 | 330                    |

<sup>a</sup>Reaction conditions: RuHCl(CO)(PPh<sub>3</sub>)<sub>3</sub> (0.1 mol%), EMIM PO<sub>2</sub>(OEt)<sub>2</sub> (1 mL), FA (13.3 mmol, 0.5 mL), 90 °C. NMR error margin of 10%. <sup>b</sup>Determined by <sup>1</sup>H-NMR.



**Table S24. Cycle 2.** FA Dehydrogenation over time in EMIM PO<sub>2</sub>(OEt)<sub>2</sub> at 90 °C with RuHCl(CO)(PPh<sub>3</sub>)<sub>3</sub> (0.1 mol%).

| Entry | Time   | Conv. [%] <sup>b</sup> | TON | TOF (h <sup>-1</sup> ) |
|-------|--------|------------------------|-----|------------------------|
| 1     | 15 min | 15                     | 150 | 600                    |
| 2     | 30 min | 19                     | 190 | 380                    |
| 3     | 45 min | 20                     | 200 | 270                    |
| 4     | 1 h    | 20                     | 200 | 200                    |
| 5     | 2 h    | 26                     | 260 | 130                    |
| 6     | 3 h    | 36                     | 360 | 120                    |

<sup>a</sup>Reaction conditions: In each cycle, 0.5 mL FA is added. The solution is stirred overnight at 90 °C between finishing a cycle and commencing the next. RuHCl(CO)(PPh<sub>3</sub>)<sub>3</sub> (0.1 mol%), EMIM PO<sub>2</sub>(OEt)<sub>2</sub> (1 mL), FA (13.3 mmol, 0.5 mL), 90 °C. NMR error margin of 10%.

<sup>b</sup>Determined by <sup>1</sup>H-NMR.

**Table S25. Cycle 3.** FA Dehydrogenation over time in EMIM PO<sub>2</sub>(OEt)<sub>2</sub> at 90 °C with RuHCl(CO)(PPh<sub>3</sub>)<sub>3</sub> (0.1 mol%).

| Entry | Time   | Conv. [%] <sup>b</sup> | TON | TOF (h <sup>-1</sup> ) |
|-------|--------|------------------------|-----|------------------------|
| 1     | 15 min | 5                      | 50  | 200                    |
| 2     | 30 min | 12                     | 120 | 240                    |
| 3     | 45 min | 13                     | 130 | 170                    |
| 4     | 1 h    | 18                     | 180 | 180                    |
| 5     | 2 h    | 31                     | 310 | 160                    |
| 6     | 3 h    | 44                     | 440 | 150                    |

<sup>a</sup>Reaction conditions: In each cycle, 0.5 mL FA is added. The solution is stirred overnight at 90 °C between finishing a cycle and commencing the next. RuHCl(CO)(PPh<sub>3</sub>)<sub>3</sub> (0.1 mol%), EMIM PO<sub>2</sub>(OEt)<sub>2</sub> (1 mL), FA (13.3 mmol, 0.5 mL), 90 °C. NMR error margin of 10%.

<sup>b</sup>Determined by <sup>1</sup>H-NMR.

**Table S26. Cycle 4.** FA Dehydrogenation over time in EMIM PO<sub>2</sub>(OEt)<sub>2</sub> at 90 °C with RuHCl(CO)(PPh<sub>3</sub>)<sub>3</sub> (0.1 mol%).

| Entry | Time   | Conv. [%] <sup>b</sup> | TON  | TOF (h <sup>-1</sup> ) |
|-------|--------|------------------------|------|------------------------|
| 1     | 15 min | 9                      | 180  | 720                    |
| 2     | 30 min | 19                     | 380  | 760                    |
| 3     | 45 min | 24                     | 480  | 640                    |
| 4     | 1 h    | 24                     | 480  | 480                    |
| 5     | 2 h    | 39                     | 780  | 390                    |
| 6     | 3 h    | 52                     | 1000 | 330                    |

<sup>a</sup>Reaction conditions: 1 mL FA is added. The solution is stirred overnight at 90 °C between finishing a cycle and commencing the next. RuHCl(CO)(PPh<sub>3</sub>)<sub>3</sub> (0.1 mol%), EMIM PO<sub>2</sub>(OEt)<sub>2</sub> (1 mL), FA (13.3 mmol, 0.5 mL), 90 °C. NMR error margin of 10%. <sup>b</sup>Determined by <sup>1</sup>H-NMR.

**Table S27. Cycle 5.** FA Dehydrogenation over time in EMIM PO<sub>2</sub>(OEt)<sub>2</sub> at 90 °C with RuHCl(CO)(PPh<sub>3</sub>)<sub>3</sub> (0.1 mol%).

| Entry | Time   | Conv. [%] <sup>b</sup> | TON | TOF (h <sup>-1</sup> ) |
|-------|--------|------------------------|-----|------------------------|
| 1     | 15 min | 0                      | -   | -                      |
| 2     | 30 min | 0                      | -   | -                      |
| 3     | 45 min | 2                      | 20  | 30                     |
| 4     | 1 h    | 6                      | 60  | 60                     |
| 5     | 2 h    | 15                     | 150 | 80                     |
| 6     | 3 h    | 25                     | 250 | 80                     |

<sup>a</sup>Reaction conditions: In each cycle, 0.5 mL FA is added. The solution is stirred overnight at 90 °C between finishing a cycle and commencing the next. RuHCl(CO)(PPh<sub>3</sub>)<sub>3</sub> (0.1 mol%), EMIM PO<sub>2</sub>(OEt)<sub>2</sub> (1 mL), FA (13.3 mmol, 0.5 mL), 90 °C. NMR error margin of 10%. <sup>b</sup>Determined by <sup>1</sup>H-NMR.

**Table S28. Cycle 6.** FA Dehydrogenation over time in EMIM PO<sub>2</sub>(OEt)<sub>2</sub> at 90 °C with RuHCl(CO)(PPh<sub>3</sub>)<sub>3</sub> (0.1 mol%).

| Entry | Time   | Conv. [%] <sup>b</sup> | TON | TOF (h <sup>-1</sup> ) |
|-------|--------|------------------------|-----|------------------------|
| 1     | 15 min | 0                      | -   | -                      |
| 2     | 30 min | 0                      | -   | -                      |
| 3     | 45 min | 6                      | 60  | 80                     |
| 4     | 1 h    | 14                     | 140 | 140                    |
| 5     | 2 h    | 14                     | 140 | 70                     |
| 6     | 3 h    | 21                     | 210 | 70                     |

<sup>a</sup>Reaction conditions: In each cycle, 0.5 mL FA is added. The solution is stirred overnight at 90 °C between finishing a cycle and commencing the next. RuHCl(CO)(PPh<sub>3</sub>)<sub>3</sub> (0.1 mol%), EMIM PO<sub>2</sub>(OEt)<sub>2</sub> (1 mL), FA (13.3 mmol, 0.5 mL), 90 °C. NMR error margin of 10%.

<sup>b</sup>Determined by <sup>1</sup>H-NMR.

**Table S29. Cycle 1.** FA Dehydrogenation over time in EMIM PO<sub>2</sub>(OEt)<sub>2</sub> at 90 °C with RuCl<sub>2</sub>(CO)(PPh<sub>3</sub>)<sub>2</sub>(dmf) (0.1 mol%).

| Entry | Time   | Conv. [%] <sup>b</sup> | TON  | TOF (h <sup>-1</sup> ) |
|-------|--------|------------------------|------|------------------------|
| 1     | 15 min | 27                     | 270  | 1080                   |
| 2     | 30 min | 42                     | 420  | 840                    |
| 3     | 45 min | 97                     | 970  | 1300                   |
| 4     | 1 h    | >99                    | 1000 | 1000                   |
| 5     | 2 h    | >99                    | 1000 | 500                    |
| 6     | 3 h    | >99                    | 1000 | 330                    |

<sup>a</sup>Reaction conditions: Precursor RuCl<sub>2</sub>(CO)(PPh<sub>3</sub>)<sub>2</sub>(dmf) (0.1 mol%), EMIM PO<sub>2</sub>(OEt)<sub>2</sub> (1 mL), FA (13.3 mmol, 0.5 mL), 90 °C. NMR error margin of 10%. <sup>b</sup>Determined by <sup>1</sup>H-NMR.

**Table S30. Cycle 2.** FA Dehydrogenation over time in EMIM PO<sub>2</sub>(OEt)<sub>2</sub> at 90 °C with RuCl<sub>2</sub>(CO)(PPh<sub>3</sub>)<sub>2</sub>(dmf) (0.1 mol%).

| Entry | Time   | Conv. [%] <sup>b</sup> | TON  | TOF (h <sup>-1</sup> ) |
|-------|--------|------------------------|------|------------------------|
| 1     | 15 min | 20                     | 200  | 800                    |
| 2     | 30 min | 23                     | 230  | 460                    |
| 3     | 45 min | 30                     | 300  | 400                    |
| 4     | 1 h    | 43                     | 430  | 430                    |
| 5     | 2 h    | >99                    | 1000 | 500                    |
| 6     | 3 h    | >99                    | 1000 | 330                    |

<sup>a</sup>Reaction conditions: In each cycle, 0.5 mL FA is added. The solution is stirred overnight at 90 °C between finishing a cycle and commencing the next. Precursor RuCl<sub>2</sub>(CO)(PPh<sub>3</sub>)<sub>2</sub>(dmf) (0.1 mol%), EMIM PO<sub>2</sub>(OEt)<sub>2</sub> (1 mL), FA (13.3 mmol, 0.5 mL), 90 °C. NMR error margin of 10%. <sup>b</sup>Determined by <sup>1</sup>H-NMR.

**Table S31. Cycle 3.** FA Dehydrogenation over time in EMIM PO<sub>2</sub>(OEt)<sub>2</sub> at 90 °C with RuCl<sub>2</sub>(CO)(PPh<sub>3</sub>)<sub>2</sub>(dmf) (0.1 mol%).

| Entry | Time   | Conv. [%] <sup>b</sup> | TON  | TOF (h <sup>-1</sup> ) |
|-------|--------|------------------------|------|------------------------|
| 1     | 15 min | 22                     | 220  | 880                    |
| 2     | 30 min | 22                     | 220  | 440                    |
| 3     | 45 min | 25                     | 250  | 330                    |
| 4     | 1 h    | 27                     | 270  | 270                    |
| 5     | 2 h    | 70                     | 700  | 350                    |
| 6     | 3 h    | >99                    | 1000 | 330                    |

<sup>a</sup>Reaction conditions: In each cycle, 0.5 mL FA is added. The solution is stirred overnight at 90 °C between finishing a cycle and commencing the next. Precursor RuCl<sub>2</sub>(CO)(PPh<sub>3</sub>)<sub>2</sub>(dmf) (0.1 mol%), EMIM PO<sub>2</sub>(OEt)<sub>2</sub> (1 mL), FA (13.3 mmol, 0.5 mL), 90 °C. NMR error margin of 10%. <sup>b</sup>Determined by <sup>1</sup>H-NMR.

**Table S32. Cycle 4.** FA Dehydrogenation over time in EMIM PO<sub>2</sub>(OEt)<sub>2</sub> at 90 °C with RuCl<sub>2</sub>(CO)(PPh<sub>3</sub>)<sub>2</sub>(dmf) (0.1 mol%).

| Entry | Time   | Conv. [%] <sup>b</sup> | TON | TOF (h <sup>-1</sup> ) |
|-------|--------|------------------------|-----|------------------------|
| 1     | 15 min | 2                      | 40  | 160                    |
| 2     | 30 min | 8                      | 160 | 320                    |
| 3     | 45 min | 16                     | 320 | 430                    |
| 4     | 1 h    | 16                     | 320 | 320                    |
| 5     | 2 h    | 29                     | 580 | 290                    |
| 6     | 3 h    | 33                     | 660 | 220                    |

<sup>a</sup>Reaction conditions: 1 mL FA is added. The solution is stirred overnight at 90 °C between finishing a cycle and commencing the next. Precursor RuCl<sub>2</sub>(CO)(PPh<sub>3</sub>)<sub>2</sub>(dmf) (0.1 mol%), EMIM PO<sub>2</sub>(OEt)<sub>2</sub> (1 mL), FA (13.3 mmol, 0.5 mL), 90 °C. NMR error margin of 10%.

<sup>b</sup>Determined by <sup>1</sup>H-NMR.

**Table S33. Cycle 5.** FA Dehydrogenation over time in EMIM PO<sub>2</sub> (OEt)<sub>2</sub> at 90 °C with RuCl<sub>2</sub>(CO)(PPh<sub>3</sub>)<sub>2</sub>(dmf) (0.1 mol%).

| Entry | Time   | Conv. [%] <sup>b</sup> | TON | TOF (h <sup>-1</sup> ) |
|-------|--------|------------------------|-----|------------------------|
| 1     | 15 min | 0                      | -   | -                      |
| 2     | 30 min | 1                      | 10  | 20                     |
| 3     | 45 min | 10                     | 100 | 130                    |
| 4     | 1 h    | 19                     | 190 | 190                    |
| 5     | 2 h    | 29                     | 290 | 150                    |
| 6     | 3 h    | 65                     | 650 | 220                    |

<sup>a</sup>Reaction conditions: In each cycle, 0.5 mL FA is added. The solution is stirred overnight at 90 °C between finishing a cycle and commencing the next. Precursor RuCl<sub>2</sub>(CO)(PPh<sub>3</sub>)<sub>2</sub>(dmf) (0.1 mol%), EMIM PO<sub>2</sub> (OEt)<sub>2</sub> (1 mL), FA (13.3 mmol, 0.5 mL), 90 °C. NMR error margin of 10%. <sup>b</sup>Determined by <sup>1</sup>H-NMR.

**Table S34. Cycle 6.** FA Dehydrogenation over time in EMIM PO<sub>2</sub>(OEt)<sub>2</sub> at 90 °C with RuCl<sub>2</sub>(CO)(PPh<sub>3</sub>)<sub>2</sub>(dmf) (0.1 mol%).

| Entry | Time   | Conv. [%] <sup>b</sup> | TON | TOF (h <sup>-1</sup> ) |
|-------|--------|------------------------|-----|------------------------|
| 1     | 15 min | 2                      | 20  | 80                     |
| 2     | 30 min | 6                      | 60  | 120                    |
| 3     | 45 min | 6                      | 60  | 80                     |
| 4     | 1 h    | 6                      | 60  | 60                     |
| 5     | 2 h    | 18                     | 180 | 90                     |
| 6     | 3 h    | 29                     | 290 | 100                    |

<sup>a</sup>Reaction conditions: In each cycle, 0.5 mL FA is added. The solution is stirred overnight at 90 °C between finishing a cycle and commencing the next. Precursor RuCl<sub>2</sub>(CO)(PPh<sub>3</sub>)<sub>2</sub>(dmf) (0.1 mol%), EMIM PO<sub>2</sub>(OEt)<sub>2</sub> (1 mL), FA (13.3 mmol, 0.5 mL), 90 °C. NMR error margin of 10%. <sup>b</sup>Determined by <sup>1</sup>H-NMR.

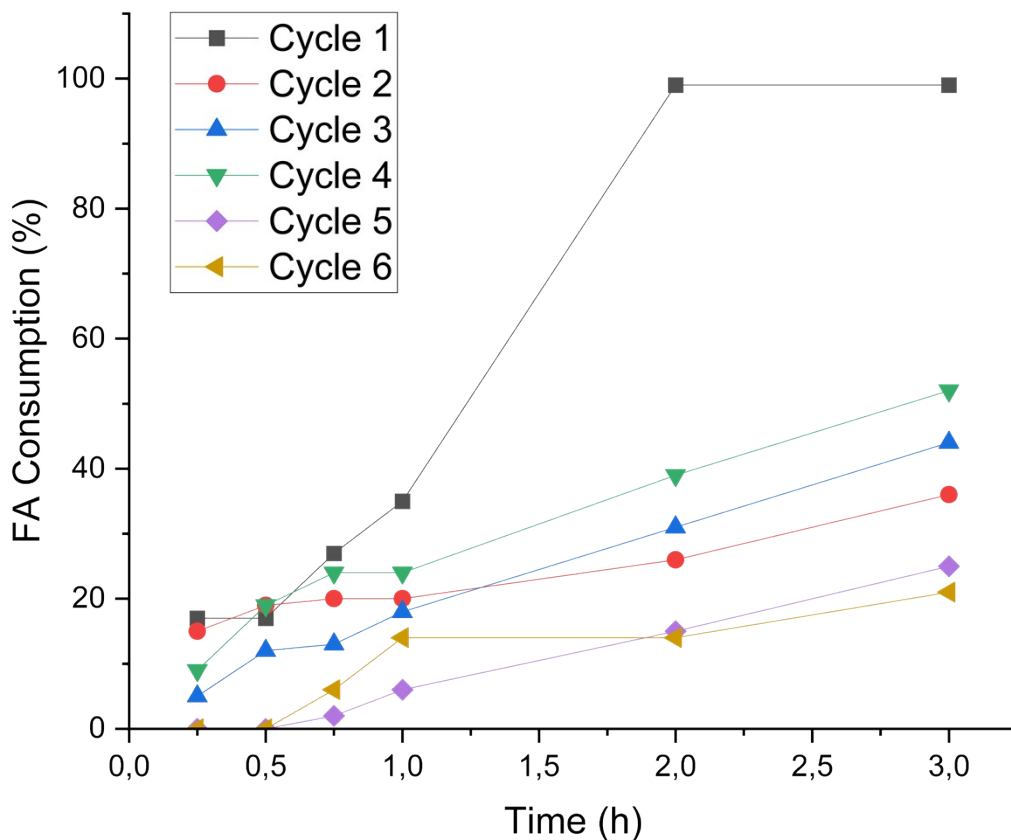

**Figure S26.** FADH cycles using the optimised catalytic system of  $\text{RuHCl}(\text{CO})(\text{PPh}_3)_3$  in EMIM  $\text{PO}_2(\text{OEt})_2$ .<sup>a</sup>

<sup>a</sup>Standard reaction conditions:  $\text{Ru}(\text{H})(\text{PPh}_3)_3(\text{CO})\text{Cl}$  (0.1 mol% in first cycle), EMIM  $\text{PO}_2(\text{OEt})_2$  (1 mL), FA (0.5 or 1.0 mL), 90 °C, 3 h under gentle flow of Ar. In each cycle, 0.5 mL FA is added. The solution is stirred overnight at 90 °C between finishing a cycle and commencing the next. In the fourth cycle 1 mL FA added after leaving the solution of the catalyst in IL stirring overnight at 90 °C.

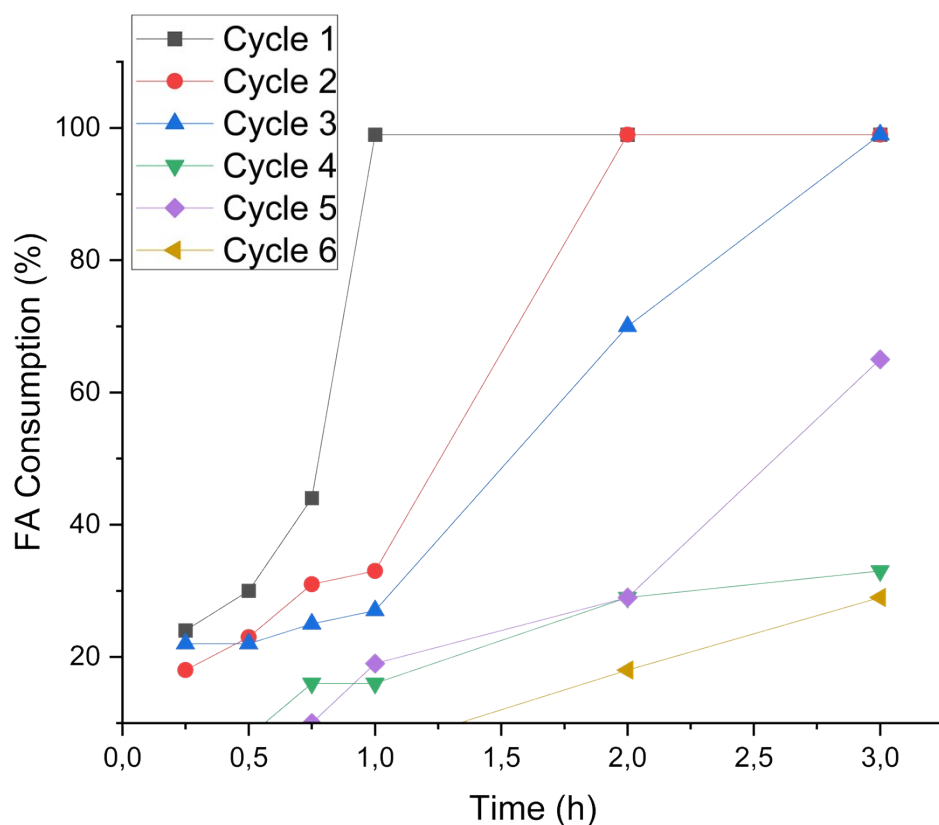

**Figure S27.** FADH cycles using the optimised catalytic system of  $\text{RuCl}_2(\text{CO})(\text{PPh}_3)_2(\text{dmf})$  in  $\text{EMIM PO}_2(\text{OEt})_2$ .<sup>a</sup>

<sup>a</sup>Standard reaction conditions:  $\text{RuCl}_2(\text{CO})(\text{PPh}_3)_2(\text{dmf})$  (0.1 mol% in first cycle),  $\text{EMIM PO}_2(\text{OEt})_2$  (1 mL), FA (0.5 or 1.0 mL), 90 °C, 3 h under gentle flow of Ar. In each cycle, 0.5 mL FA is added. The solution is stirred overnight at 90 °C between finishing a cycle and commencing the next. In the fourth cycle 1 mL FA added after leaving the solution of the catalyst in IL stirring overnight at 90 °C.



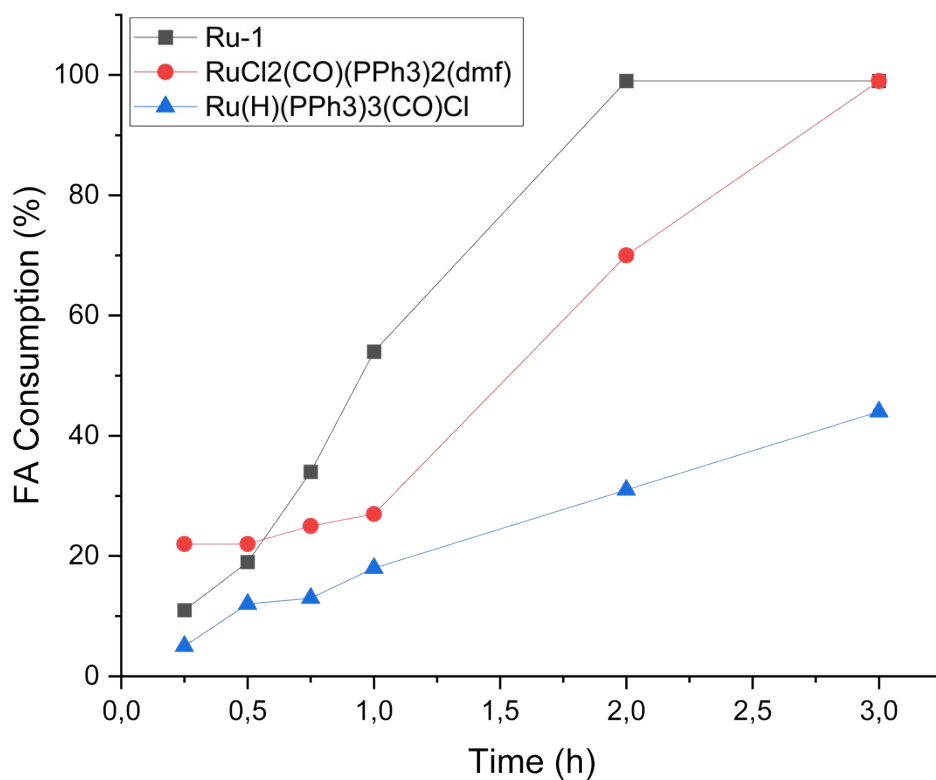

**Figure S28.** FADH third cycle. Comparison among the complexes tested.

<sup>a</sup>Standard reaction conditions: **Ru catalyst** (0.1 mol% in first cycle), EMIM PO<sub>2</sub>(OEt)<sub>2</sub> (1 mL), FA (0.5 or 1.0 mL), 90 °C, 3 h under gentle flow of Ar. In each cycle, 0.5 mL FA is added. The solution is stirred overnight at 90 °C between finishing a cycle and commencing the next. In the fourth cycle 1 mL FA added after leaving the solution of the catalyst in IL stirring overnight at 90 °C.

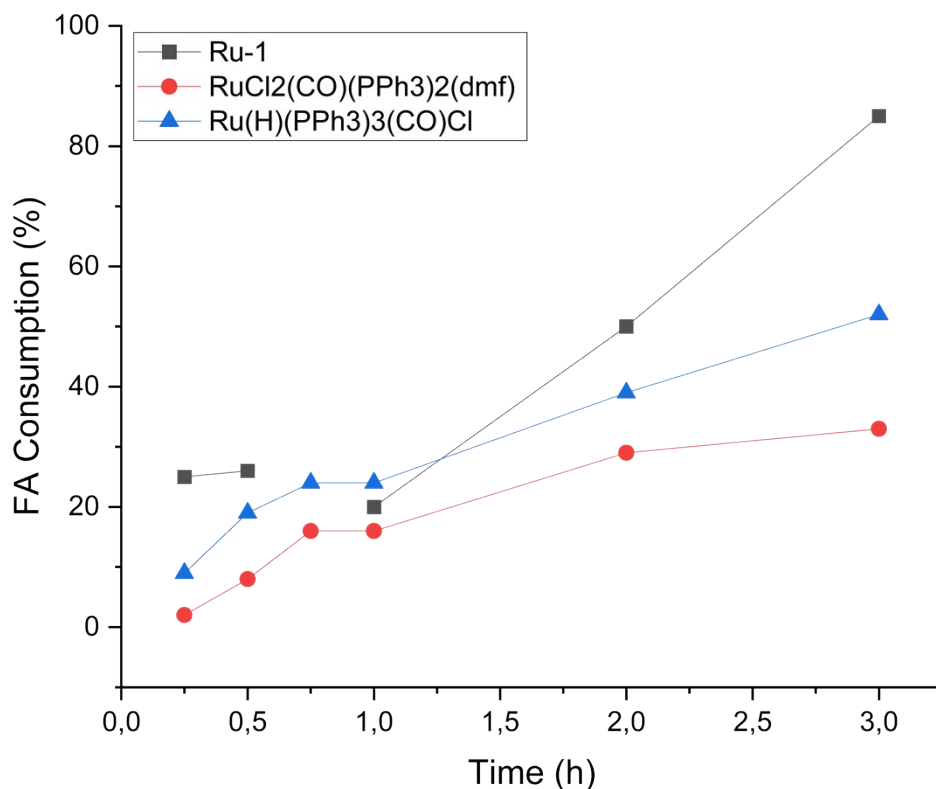

**Figure S29.** FADH fourth cycle, after adding an excess of FA (1 mL). Comparison among the complexes tested.

<sup>a</sup>Standard reaction conditions: **Ru catalyst** (0.1 mol% in first cycle), EMIM PO<sub>2</sub>(OEt)<sub>2</sub> (1 mL), FA (0.5 or 1.0 mL), 90 °C, 3 h under gentle flow of Ar. In each cycle, 0.5 mL FA is added. The solution is stirred overnight at 90 °C between finishing a cycle and commencing the next. In the fourth cycle 1 mL FA added after leaving the solution of the catalyst in IL stirring overnight at 90 °C.

## Bibliography

- (1) Morales-Morales D. *et al.* in High yield carbonylation of  $[\text{RuCl}_2(\text{PPh}_3)_3]$  using dimethylformamide (DMF) as convenient source of CO. The X-ray crystal structure of  $[\text{RuCl}_2(\text{CO})(\text{DMF})(\text{PPh}_3)_2]$ . *J. Mol. Struct.*, **689**, 137-141 (2004)
- (2) Fulmer, G. R. *et al.* in NMR chemical shifts of trace impurities: Common laboratory solvents, organics, and gases in deuterated solvents relevant to the organometallic chemist. *Organometallics* **29**, 2176–2179 (2010).
- (3) Puschmann H. *et al.* in OLEX2: a complete structure solution, refinement and analysis program, *J. Appl. Crystallogr.* **42**, 339–341 (2009)
- (4) G.M. Sheldrick in SHELXT – Integrated space-group and crystal-structure determination, *Acta Crystallogr. Sect. A Found. Adv.* **71**, 3–8 (2015).
- (5) R. Zhong, Z. Wei, W. Zhang, S. Liu and Q. Liu, *Chem*, 2019, **5**, 1552–1566.
- (6) J. Houghton, G. Dyson, R. E. Douthwaite, A. C. Whitwood and B. M. Kariuki, *Dalton Trans.*, 2007, 3065–3073.
- (7) C.-F. Yang, T. Lu, X.-T. Chen and Z.-L. Xue, *Chem. Commun.*, 2018, **54**, 7830–7833.
- (8) W. B. Cross, C. G. Daly, R. L. Ackerman, I. R. George and K. Singh, *Dalton Trans.*, 2011, **40**, 495–505.
- (9) W. Wei, Y. Qin, M. Luo, P. Xia and M. S. Wong, *Organometallics*, 2008, **27**, 2268–2272.
